1 **A genetic selection reveals functional metastable structures**  
2 **embedded in a toxin-encoding mRNA**

3

4 Sara Masachis<sup>#</sup>, Nicolas J. Tourasse, Claire Lays, Marion Faucher, Sandrine Chabas,  
5 Isabelle Iost and Fabien Darfeuille\*

6 University of Bordeaux, INSERM U1212, CNRS UMR 5320, ARNA Laboratory, F-  
7 33076 Bordeaux, France.

8

9 \* Author to whom correspondence should be addressed.

10 Email: [fabien.darfeuille@inserm.fr](mailto:fabien.darfeuille@inserm.fr) Tel: +33557574565

11

12 <sup>#</sup>present address: Faculty of Biology I, Department of Microbiology, Ludwig-Maximilians-University of  
13 Munich, 82152 Martinsried, Germany

14

15

16

17

18

19

20

21

22

23

24

## 25 **Abstract**

26 Post-transcriptional regulation plays important roles to finely tune gene expression in  
27 bacteria. In particular, regulation of type I toxin-antitoxin (TA) systems is achieved  
28 through sophisticated mechanisms involving toxin mRNA folding. Here, we set up a  
29 genetic approach to decipher the molecular underpinnings behind the regulation of a  
30 type I TA in *Helicobacter pylori*. We used the lethality induced by chromosomal  
31 inactivation of the antitoxin to select mutations that suppress toxicity. We found that  
32 single point mutations are sufficient to allow cell survival. Mutations located either in  
33 the 5' untranslated region or within the open reading frame of the toxin hamper its  
34 translation by stabilizing stem-loop structures that sequester the Shine-Dalgarno  
35 sequence. We propose that these short hairpins correspond to metastable structures  
36 that are transiently formed during transcription to avoid premature toxin expression.  
37 This work uncovers the co-transcriptional inhibition of translation as an additional layer  
38 of TA regulation in bacteria.

39

40

41

42 **Key words** Toxin-antitoxin systems, co-transcriptional folding, co-transcriptional  
43 translation, post-transcriptional regulation, mRNA structure, Shine-Dalgarno  
44 sequestration, metastable structures.

45

46

47

48

49

50

51

52

53

54

55

56

## 57 INTRODUCTION

58 In any living cell, unwanted gene expression can have a detrimental effect on cell  
59 growth, and eventually lead to cell death. In bacteria, a fine tuning of gene expression  
60 can be achieved at the translational level through the control of the ribosome binding  
61 site (RBS) accessibility, which encompasses the Shine-Dalgarno (SD) sequence and  
62 the start codon. Messenger RNA structures occluding the RBS have been reported to  
63 control the expression of many important genes for which a timely control is crucial.  
64 Regulation of translation initiation via SD-sequestration is an old theme that initially  
65 started with the study of bacteriophage genes (De Smit & Duin, 1990) and ribosomal  
66 proteins (for review see Duval et al., 2015). More recently, its impact on other bacterial  
67 genes such as sigma factors (Mearls et al., 2018) and translational riboswitches  
68 (Rinaldi, Lund, Blanco, & Walter, 2016) has been reported.

69 Hence, in many cases, preventing gene expression via SD-sequence  
70 sequestration is crucial. This is particularly true for type I toxin-antitoxin (TA) systems.  
71 In contrast to the largest type II TA family, antitoxins belonging to type I TA systems  
72 do not directly interact with the toxin protein but rather prevent its expression (Harms,  
73 Brodersen, Mitarai, & Gerdes, 2018). This regulation occurs through the direct base-  
74 pairing of the RNA antitoxin with the toxin mRNA and leads to toxin translation inhibition  
75 and/or mRNA degradation (Brantl & Jahn, 2015; Durand, Jahn, Condon, & Brantl,  
76 2012; Wen & Fozo, 2014). However, the action of the RNA antitoxin is often not  
77 sufficient to avoid toxin expression (Masachis & Darfeuille, 2018). Indeed, due to the  
78 coupling between transcription and translation occurring in bacteria, translation of the  
79 nascent toxin mRNA can potentially occur before antitoxin action. Thus, a tight control  
80 of toxin synthesis is usually achieved via the direct sequestration of its SD sequence  
81 within stable stem-loop structures (Masachis & Darfeuille, 2018). The existence of a  
82 non-translatable toxin primary transcript is a major hallmark of type I TA loci. In this  
83 transcript, the RBS occlusion occurs through the base-pairing of the SD sequence with  
84 a partially or totally complementary sequence termed anti-SD (aSD). Such aSD  
85 sequences are often located a few nucleotides (up to 11) upstream or downstream of  
86 the SD sequence and trap it within a hairpin structure. However, in some cases, RBS  
87 occlusion involves an aSD sequence encoded far downstream and is achieved via a  
88 long-distance interaction (LDI) between the 5' and 3' ends of the toxin mRNA  
89 (Gulyaev, Franch, & Gerdes, 1997; Han, Kim, Bak, Park, & Lee, 2010).

90 This strategy of toxin expression regulation via the formation of a LDI has been

91 recently described for a type I TA family of the *Epsilon* proteobacteria. This family,  
92 named *aapA/IsoA*, is present in several copies on the chromosome of the major human  
93 gastric pathogen *Helicobacter pylori*. We characterized the *aapA1/IsoA1* TA system at  
94 the locus I and showed that the *aapA1* gene codes for a small toxic protein whose  
95 expression is repressed by a *cis*-overlapping antisense RNA, IsoA1 (Arnion et al.,  
96 2017). We have shown that transcription of this toxic gene generates a highly stable  
97 primary transcript whose translation is post-transcriptionally impeded by a 5'-3' LDI.  
98 Consequently, a 3'-end ribonucleolytic event, that we termed 'mRNA activation step',  
99 is necessary to remove the LDI, thus enabling toxin translation (Arnion et al., 2017).

100 In the present work, we aimed at deciphering the mechanism of expression of  
101 another module belonging to the *aapA/IsoA* family, the *aapA3/IsoA3*. We first showed  
102 that, in the absence of antitoxin expression, chromosomal toxin expression is lethal.  
103 Taking advantage of this lethal phenotype, we used a genetic approach to select  
104 suppressors allowing survival. This method, that we previously named FASTBAC-Seq  
105 for Functional Analysis of Toxin-antitoxin in BACteria by deep Sequencing, allows the  
106 mapping of intragenic toxicity suppressors within a given TA locus (Masachis,  
107 Tourasse, Chabas, Bouchez, & Darfeuille, 2018). In the case of the *aapA3/IsoA3* TA  
108 locus, FASTBAC-Seq revealed that single point mutations are sufficient to counteract  
109 the lethality caused by the absence of antitoxin. Unexpectedly, one-third of  
110 suppressors mapped to non-coding regions of the toxin mRNA. Some of them target  
111 well-known regulatory elements such as the toxin promoter and the SD sequence.  
112 Remarkably, we showed that one of the suppressors located in the SD sequence does  
113 not act at the sequence level but at the mRNA structural level. Indeed, this mutation  
114 inhibits translation of the active mRNA by stabilizing an RNA hairpin in which the SD  
115 sequence is masked by an upstream-encoded aSD sequence (aSD1). A synonymous  
116 mutation within the Open Reading Frame (ORF) acts similarly but on another hairpin  
117 in which the SD sequence is masked by a downstream-encoded aSD (aSD2). These  
118 suppressor mutations reveal two transient hairpin structures that sequentially form  
119 during transcription and which are then replaced by a more stable LDI upon  
120 transcription termination. Our results indicate that, in addition to the post-transcriptional  
121 control achieved via a stable LDI, metastable structures are also required to prevent  
122 premature toxin expression in a co-transcriptional manner.

123

## 124 RESULTS

### 125 The small antisense RNA IsoA3 is essential to prevent AapA3 translation

126 We previously studied the regulation of *aapA1/IsoA1*, a member of the *aapA/IsoA* type  
127 I TA family recently identified in *H. pylori* (Arnion et al., 2017). Here, we studied the  
128 *aapA3/IsoA3* module (Figure 1A; for sequence details see Figure 1 - figure supplement  
129 1). As other TA systems of this family, the *aapA3/IsoA3* locus codes for an antisense  
130 RNA, IsoA3 (80 nucleotides), encoded on the opposite strand of a small ORF, AapA3.  
131 The AapA3 peptide (30 amino acids) shares 60% sequence homology with the AapA1  
132 peptide, whose ectopic expression is toxic in *H. pylori* (Arnion et al., 2017). Here, we  
133 first investigated whether *aapA3* expression from the chromosome is toxic. For this  
134 purpose, we inactivated the antitoxin promoter by introducing two point mutations in its  
135 -10 box, while maintaining the amino acid sequence of the toxin (Figure 1B, pIsoA3\*  
136 in all figures), as previously described for the IsoA1 promoter (Arnion et al., 2017).  
137 Insertion of these mutations on the chromosome was performed using a counter-  
138 selection cassette, which allows the generation of unmarked transformants (Dailidiene,  
139 Dailide, Kersulyte, & Berg, 2006). Briefly, the TA locus of a streptomycin resistant  
140 26695 strain (K43R) was replaced by the *rpsL<sub>CJ</sub>-erm* double marker cassette, giving rise  
141 to the streptomycin sensitive  $\Delta aapA3/IsoA3::rpsL_{CJ}-erm/K43R$  strain (see Figure 3B)  
142 (Masachis et al., 2018). Then, we performed gene replacement assays using PCR  
143 constructs carrying either a wild-type or an antitoxin inactivated (pIsoA3\*) TA locus.  
144 Strains that had undergone homologous recombination were selected on  
145 streptomycin. However, no transformants were obtained unless a non-sense or a  
146 frameshift mutation was introduced in the *aapA3* ORF. This result indicated that, in the  
147 absence of IsoA3 synthesis, the AapA3 toxin expression from its chromosomal locus  
148 is constitutive and too toxic to obtain a viable strain.

149 Total RNA of two viable transformants containing either a mutation at the start  
150 codon (*start*) or a -1 frameshift mutation leading to a premature stop codon (*fs*<sup>-1</sup>)  
151 (Figure 1B) were analyzed by Northern Blot (Figure 1C). The absence of IsoA3  
152 transcript (Figure 1C, lanes 9-12) confirmed the successful inactivation of the IsoA3  
153 promoter. As a control, the complementation of the  $\Delta aapA3/IsoA3::rpsL_{CJ}-erm/K43R$   
154 strain ( $\Delta A3$ ) with the WT *aapA3/IsoA3* locus (*C*<sup>A3</sup>) was successfully achieved with no  
155 change in the expression pattern (Figure 1C, compare lanes 5-6 with lanes 1-2). Two  
156 *AapA3* mRNA species were detected in absence of IsoA3 expression (Figure 1C, lanes  
157 9 to 12): a long transcript of 225 nt, which was denoted *aapA3-FL* (full-length) and a

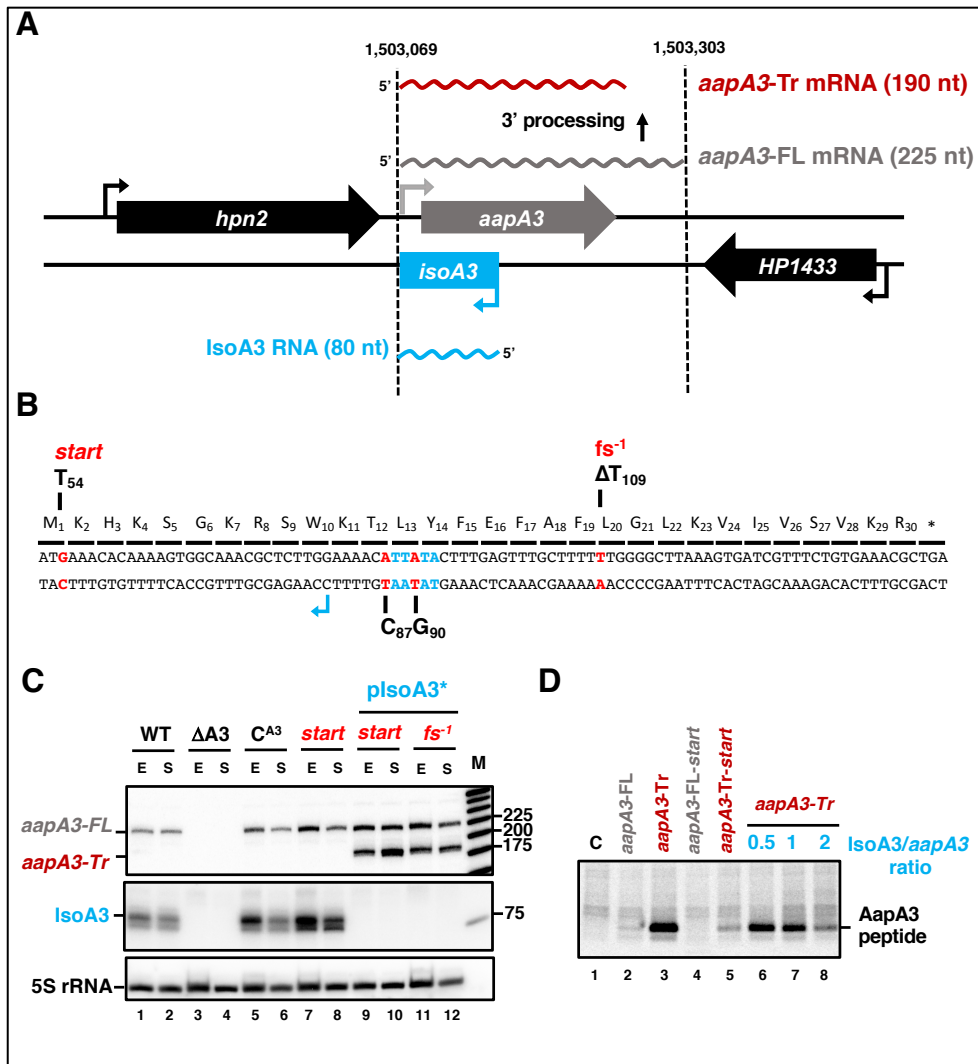

158

159 **Figure 1. IsoA3 small RNA is essential to prevent AapA3 translation.** (A) Organization of the  
 160 *aapA3*/*IsoA3* locus in the *H. pylori* 26695 strain. Grey arrow, AapA3 ORF; blue box, *IsoA3* RNA; small  
 161 bent arrows, -10 box of each transcript. Grey, red and blue wavy lines represent *aapA3-FL* (full-length),  
 162 *aapA3-Tr* (3'-end truncated) and *IsoA3* transcripts, respectively. Their approximate length is also  
 163 indicated. (B) Nucleotide and amino acid sequence of AapA3 ORF with hallmarks. The sequence of the  
 164 *IsoA3* promoter (-10 box) is shown in blue. The nucleotides that were mutated to inactivate the *IsoA3*  
 165 promoter (*pIsoA3\**) and the AapA3 start codon (*start*), and to create a -1 frameshift (*fs*<sup>-1</sup>) are shown in  
 166 red. (C) The 'WT' strain corresponds to the 26695 *H. pylori* strain containing the K43R mutation in the  
 167 *rpsL* gene, which confers resistance to streptomycin. The ΔA<sub>3</sub> strain is the parental strain in which the  
 168 *aapA3*/*IsoA3* locus has been replaced by the *rpsL*<sub>Cj</sub>-erm cassette (Δ*aapA3*/*IsoA3*::*rpsL*<sub>Cj</sub>-erm). The C<sup>A3</sup>  
 169 and *start* strains correspond to the ΔA<sub>3</sub> strain complemented with the WT *aapA3*/*IsoA3* locus and with  
 170 the locus mutated at the start codon (G<sub>54</sub>T), respectively. The two strains inactivated for the *IsoA3*  
 171 promoter (*pIsoA3\**) also contain a frameshift mutation (*fs*<sup>-1</sup>) or a mutation in the start codon (*start*).  
 172 Total RNA from stationary (S) or exponential (E) growth phase of the indicated strains was isolated and  
 173 subjected to Northern blot. The *aapA3-FL*, *aapA3-Tr*, and *IsoA3* transcripts are shown. 5S rRNA  
 174 assessed proper loading. (D) Translation assays were performed with 0.5 μg of *aapA3* mRNAs in

175 absence or presence of IsoA3, in 0.5, 1 or 2 molar ratios. [<sup>35</sup>S]-Met was used for labeling. The control  
 176 lane (C) shows the translation background obtained without exogenous mRNA.

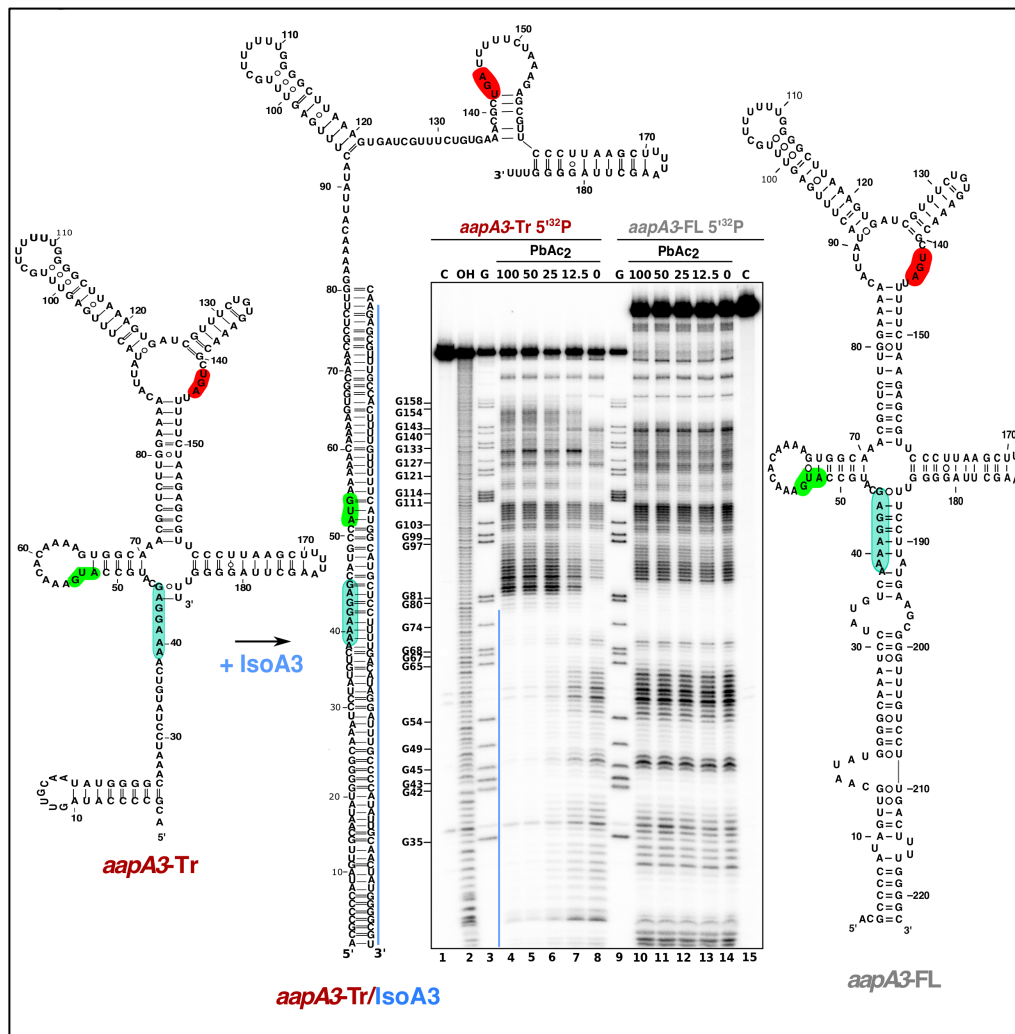

177  
 178 **Figure 2. IsoA3 inhibits *aapA3*-Tr translation by masking its SD region.** ~0.1 pmol of 5'-end  
 179 [<sup>32</sup>P]-labeled *in vitro* transcribed *aapA3*-FL and *aapA3*-Tr RNAs were subjected to lead probing in  
 180 presence of increasing concentrations of IsoA3 (0-100 nM). Untreated RNA (lanes 1 and 15, denoted C)  
 181 and partially alkali digested RNA (denoted OH, lane 2) served as control and ladder, respectively.  
 182 Positions of all G residues revealed upon T1 digestion under denaturing conditions (lanes 'G') are  
 183 indicated relative to the transcription start site of the *aapA3* gene. Cleaved fragments were analyzed on  
 184 an 8% denaturing PAA gel. 2D structure predictions were generated with the RNAfold Web Server  
 185 (Gruber, Lorenz, Bernhart, Neuböck, & Hofacker, 2008) and VARNA (Darty, Denise, & Ponty, 2009)  
 186 was used to draw the diagrams. The region involved in duplex formation between IsoA3 and *aapA3*-Tr  
 187 mRNA is indicated with a blue line; the start codon, stop codon and SD sequence of AapA3 are  
 188 highlighted in green, red and turquoise, respectively.  
 189  
 190 shorter transcript lacking the last 35 nt (*aapA3*-Tr). This latter was not detected in  
 191 presence of IsoA3 RNA (Figure 1C, lanes 1, 2, 5-8) and corresponds to the truncated  
 192 mRNA species previously described for the *aapA1*/IsoA1 homolog (Arnion et al.,

193 2017). *In vitro* translation assays demonstrated that only the truncated mRNA is  
194 efficiently translated (Figure 1D, lane 3). Translation of *aapA3*-FL (Figure 1D, lane 2)  
195 or of the *aapA3*-FL containing a non-sense mutation in the start codon (Figure 1D, lane  
196 4) were close to the translational background obtained in absence of exogenous  
197 mRNA (Figure 1D, lane 1). Importantly, the absence of IsoA3 leads to the accumulation  
198 of *aapA3*-Tr without affecting the amount of *aapA3*-FL (Figure 1C lanes 9-12),  
199 indicating that IsoA3 specifically targets *aapA3*-Tr *in vivo*. *In vitro* structure probing of  
200 the two AapA3 mRNA species further confirmed that IsoA3 only interacts with the  
201 *aapA3*-Tr mRNA (Figure 2, lanes 4-7). Base-pairing between both transcripts creates  
202 an extended RNA heteroduplex of 80 base-pairs (Figure 2, lane 4) that is translationally  
203 inert, as shown by *in vitro* translation assays (Figure 1D, lanes 6-8). Remarkably, none  
204 of the IsoA RNAs produced from the five other *aapA*/IsoA chromosomal loci (I, II, IV,  
205 V and VI) can replace the absence of IsoA3 expression demonstrating that their  
206 regulation is strictly module-specific, as previously suggested by *in vitro* translation  
207 assays (Sharma et al. 2010).

208 Altogether, we showed that IsoA3 represses *aapA3* constitutive expression at  
209 the translational level by forming a stable RNA heteroduplex. This duplex is then likely  
210 degraded by the double-stranded specific ribonuclease RNase III, leading to a rapid  
211 turnover of the translationally active toxin-encoding mRNA, as shown for the  
212 *aapA1*/IsoA1 locus (Arnion et al. 2017).

213

### 214 **Decoding AapA3 toxicity determinants with nucleotide resolution**

215 To identify the toxicity determinants of this TA locus, we next aimed at taking  
216 advantage of the lethality induced by the chromosomal inactivation of the IsoA3  
217 antitoxin to search for toxicity suppressors. To this end, we performed the same gene  
218 replacement assays as described above, using two PCR constructs carrying either a  
219 wild-type TA locus (WT) or two synonymous mutations inactivating the IsoA3 promoter  
220 (*pIsoA3\**). Two PCR containing either a point mutation inactivating the start codon  
221 (*start*) or both mutations (*start/pIsoA3\**) were also used as controls (Figure 3A). These  
222 four PCR constructs were transformed into the  $\Delta aapA3$ /IsoA3::*rpsL<sub>CJ</sub>-erm*/K43R *H.*  
223 *pylori* strain and Str<sup>R</sup> transformants were selected on streptomycin-containing plates.  
224 For each transformation, the number of streptomycin-resistant colonies was  
225 determined and normalized to the total number of transformed cells (Figure 3B). As  
226 expected, when no DNA was used for transformation (H<sub>2</sub>O) only phenotypic revertants



227 having mutated the *rps/cj* gene were selected (Masachis et al., 2018). The lack of IsoA3  
228 expression led to a strong reduction (1.83 log-fold) in the number of transformed cells  
229 compared to that obtained with the WT or double-mutant *start/plsoA3\** constructs  
230 (Figure 3B). These results confirmed that in the absence of IsoA3, the chromosomal  
231 expression of AapA3 is highly toxic. Remarkably, the number of transformants  
232 obtained in absence of antitoxin was slightly higher to that obtained when no DNA was  
233 used for transformation (Figure 3B). The sequencing of the TA locus of approximately  
234 hundred *plsoA3\** transformants revealed that all of them contained point mutations in  
235 the AapA3 ORF (Masachis et al., 2018). Thus, our genetic approach selected  
236 mutations that suppress toxicity allowing the generation of recombinant strains lacking  
237 antitoxin expression.

238 To explore the complete landscape of suppressors, we next scaled-up the  
239 transformation assay using the WT or *plsoA3\** PCR products as DNA substrates. The  
240 transformation assay was performed using three independent biological replicates for  
241 each construct. Approximately 60,000 transformants per construct were collected and  
242 pooled, genomic DNA was extracted, and an amplicon of 426 nt encompassing the  
243 whole TA locus was sequenced by the Illumina paired-end approach. This approach,  
244 called FASTBAC-Seq, has been described recently (Masachis et al., 2018). Consistent  
245 with the above-mentioned first transformation assay, deep-sequencing data analysis  
246 showed that 97.7% of the *plsoA3\** transformants contained mutations (Figure 3C). A  
247 strong mutation rate (51.2%) was also observed with the WT PCR product (Figure 3C).  
248 This result was explained by an unanticipated technical artifact linked to the PCR  
249 assembly, which led to a strong mutation rate in the overlapping region used for  
250 assembly (nucleotides 80, 81 and 82 of *aapA3*, the +1 corresponding to the  
251 transcription start site [TSS]). This artifact strongly reduced the sequencing depth and  
252 impeded the analysis of double and triple mutations. Consequently, we focused our  
253 analysis on single-nucleotide mutations that have been significantly enriched (adjusted  
254 False Discovery Rate  $p_{adj} \leq 0.05$ ) in absence of antitoxin relative to WT (Figure 3D).

255 Analysis of the number of mutations per read in the complete sequencing  
256 dataset (all replicates combined) showed that more than half of the *plsoA3\**  
257 transformed clones (51.8% out of ~5.1 million) were mutated at a single nucleotide  
258

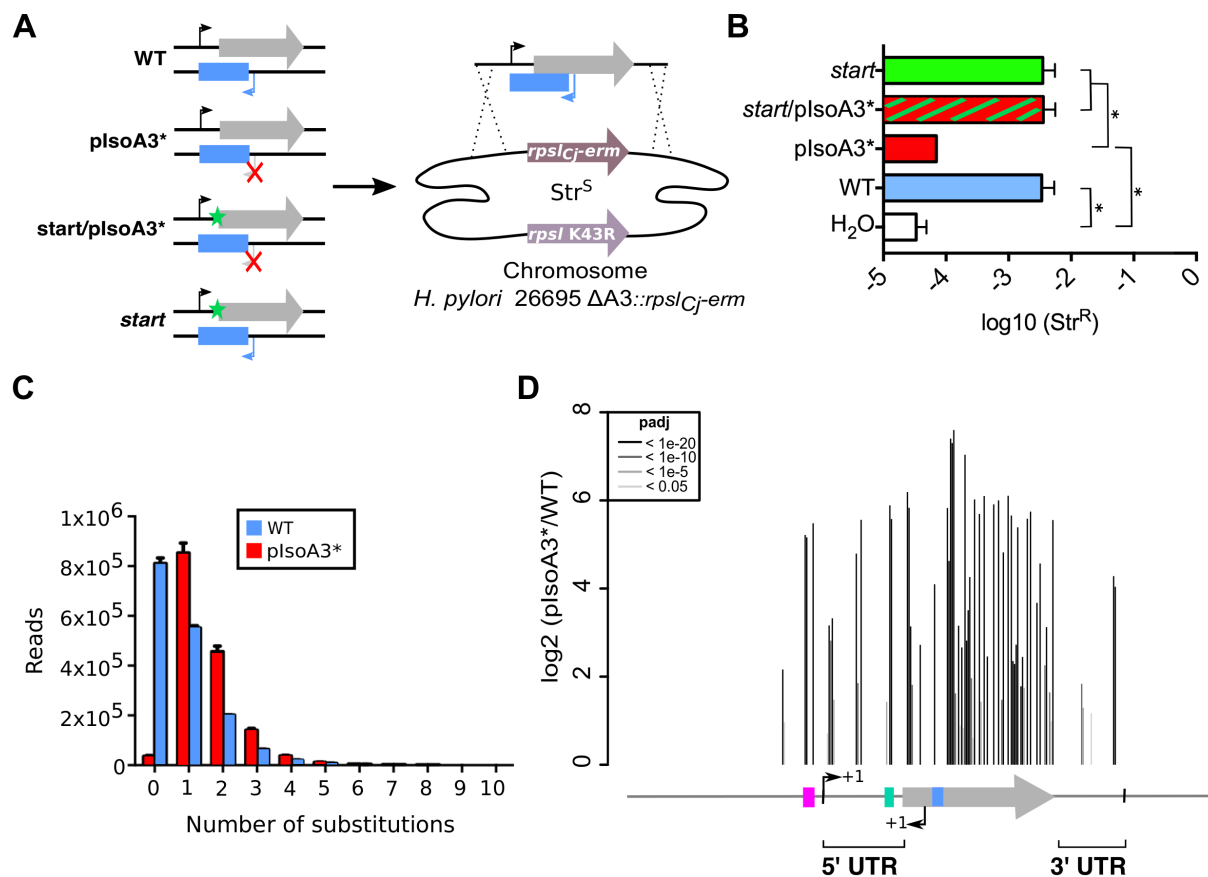

259  
 260 **Figure 3. Unveiling intragenic toxicity determinants with nucleotide resolution.** (A) PCR  
 261 fragments used for transformation of the  $\Delta A3$  strain ( $\Delta aapA3/IsoA3::rpsL_{cj-erm}$ ) are shown. A green  
 262 star indicates a mutation in the start codon (G54T). The red cross indicates the two mutations (T87C  
 263 and T90G) introduced to inactivate the IsoA3 promoter (pIsoA3\*). To select recombination at the locus,  
 264 Str<sup>R</sup> transformants were selected. (B) Transformation efficiency (number of Str<sup>R</sup> transformants divided  
 265 by the total number of transformed cells) was determined for each construct. A control in which the PCR  
 266 fragment was replaced by H<sub>2</sub>O is also shown. Error bars represent standard deviations (s.d);  $n=3$   
 267 biological replicates (\* $P<0.05$ ; values according to unpaired  $t$ -test). (C) Number of reads containing 0  
 268 to 10 substitutions in the sequenced amplicon of 426 nt encompassing the *aapA3/IsoA3* TA locus. Error  
 269 bars represent s.d;  $n=3$  biological replicates. (D) Positional analysis of single-nucleotide substitutions  
 270 on the *aapA3/IsoA3* locus. Bar plot shows the log<sub>2</sub> fold change (pIsoA3\*/WT ratio) for the 70 positions  
 271 with an adjusted  $p$ -value (padj) lower than 0.05. Bars are drawn with different shades of grey according  
 272 to the  $p$ -value. The relevant sequence elements are indicated by arrows and boxes under the graph. 5'  
 273 UTR, 5' untranslated region; purple box, *aapA3* -10 box; small bent arrows, +1 transcription start site  
 274 (TSS) of *aapA3* and IsoA3; turquoise box, *aapA3* SD sequence; large grey arrow, *aapA3* ORF; small blue  
 275 box, IsoA3 -10 box; 3' UTR, 3' untranslated region.  
 276  
 277 position (Figure 3C). This result demonstrates that single point mutations are sufficient  
 278 to abolish AapA3 toxin activity and/or expression. A low number of plsoA3\* strains  
 279 (2.3%) had a wild-type locus sequence (Figure 3C, plsoA3\* zero mutation), which can

280 be explained by the sequencing error rate (around 1.5%) and/or suppressor mutations  
281 lying in regions outside the TA locus (*i.e.*, outside the amplicon). Single-nucleotide  
282 mutations were mainly substitutions, which are favored by PCR biases. Only 4% were  
283 insertions and deletions (indels). Hierarchical clustering analysis revealed that the  
284 location and frequency of single substitutions were highly similar in the three biological  
285 replicates, indicating that the locus coverage was close to optimum (Figure 3 - figure  
286 supplement 1). Contrary to substitutions (which were found in both coding and non-  
287 coding regions), the single-nucleotide indels were almost exclusively present in the  
288 AapA3 ORF, generating truncated or longer forms of the peptide. Moreover, in some  
289 cases, they were not present in all three replicates, reflecting their under-  
290 representation in the PCR products (Figure 3 - figure supplement 1). Importantly,  
291 depending on the type of statistical analysis, “position-specific” or “nucleotide-specific”  
292 (see Material and Methods for details), there were statistically enriched substitutions  
293 in absence of antitoxin ( $p_{adj} \leq 0.05$ ) at 70 or 72 positions within the *aapA3*/*IsoA3* locus,  
294 respectively (65 positions in common between the two analyses). Substitutions  
295 identified in only one of the analyses included (relative to *aapA3* +1 TSS): i) positions  
296 -26 and -7 within the promoter region; ii) position +28 in the 5' UTR; iii) positions +64  
297 and +97 in the AapA3 ORF; and iv) positions +146 and +177 in the 3' UTR. Such  
298 positions had generally a close-to-cut-off  $p_{adj}$  value, but not in all cases. For instance,  
299 position +28, which has been studied hereafter, had a highly significant  $p_{adj}$  value of  
300  $7.2 \times 10^{-6}$ .

301 Expectedly, the highest mutation densities (defined as the number of mutated  
302 nucleotides divided by the total number of nucleotides in the region of interest) were  
303 observed in the AapA3 ORF (53%), as well as in well-known regulatory regions such  
304 as the -10 box of the toxin mRNA (66.7%, Figure 3 - figure supplement 2) and the SD  
305 sequence (42.8%) (Figure 3D). For the *aapA3* -10 box, out of the six positions (5'-  
306 TAGGAT-3'), suppressor mutations were mostly found in the first two and last  
307 nucleotides (Figure 3 - figure supplement 2). This result allowed us to determine the  
308 minimal functional *aapA3* -10 box motif 5'-TANNNT-3', which is in perfect agreement  
309 with the previously determined consensus sequence (C. M. Sharma et al., 2010). This  
310 result also confirmed that the arbitrarily-chosen False Discovery Rate cut-off ( $p_{adj} \leq$   
311 0.05) was stringent enough to avoid false positives but permissive enough to allow the  
312 identification of suppressor substitutions. Remarkably, seventeen mutations were

313 unveiled in the 5' and 3' untranslated regions (Figure 3D). In the present work, we have  
314 focused our study to mutations lying around the RBS.

315

### 316 **Two suppressor mutations in the 5' UTR impede AapA3 translation**

317 The genetic selection of suppressors allowed us to determine the minimal functional  
318 sequence of the toxin SD sequence. Among the seven positions (5'-AAAGGAG-3'),  
319 substitutions at the two central guanine nucleotides (positions +42 and +43) were the  
320 most frequently mutated in absence of antitoxin (Figure 4A). As expected from PCR  
321 biases (Beaudry & Joyce, 1992), although the transition G>A was preferentially  
322 enriched in both cases, the G>C and G>T transversion mutations were also selected.  
323 Strikingly, a less-frequent transversion mutation (A>T) was selected within the SD  
324 sequence at position +40 (A40T, Figure 4A). Moreover, another unique transversion  
325 upstream of the SD sequence was identified (A28C, Figure 4A). Strains containing  
326 these atypical mutations were constructed and further analyzed.

327 Due to their proximity to the SD sequence, we first tested whether these  
328 mutations could affect AapA3 translation *in vivo*. Due to the lack of AapA3-targeting  
329 antibodies, its translation was assessed indirectly by polysome fractionation coupled  
330 to Northern blot analysis. As a control, we used a suppressor mutation isolated during  
331 our FASTBAC-Seq selection, which inactivates the toxin activity but not its expression.  
332 We thus generated a strain containing the plsoA3\* mutations in combination with a  
333 mutation in the toxin ORF converting a phenylalanine at position 19 into a serine  
334 (T107C, Figure 4B). Polysome fractionation of this strain confirmed that the toxin full-  
335 length mRNA (*aapA3-FL*) is mainly found in non-ribosomal fractions (only 3% was  
336 present in polysomes, lanes 10 to 14 in Figure 4B; see Figure 4 - figure supplement 2  
337 for quantification) whereas the truncated isoform (*aapA3-Tr*) is associated with the  
338 monosome and disome fractions (73% present in these fractions; Figure 4B and Figure  
339 4 - figure supplement 2A). The absence of the *aapA3-Tr* form in heavier polysomes is  
340 probably due to the short length of the ORF (90 nucleotides), which cannot  
341 accommodate more than two ribosomes. This result clearly confirmed that the *aapA3-*  
342 *FL* is indeed a translationally inert isoform whereas the *aapA3-Tr* is translationally  
343 active. Hence, polysome fractionation is a powerful tool to study translation efficiency  
344 of toxin mRNAs *in vivo*.

345 We then analyzed the efficiency of toxin mRNA translation in strains containing  
346 a mutation either in the start codon (*start*) or in the SD sequence (G43A) (Figure 4B).

347 In both cases, the active mRNA isoform (*aapA3*-Tr) was no more found within the  
348 polysome fractions. Instead, significant levels of *aapA3*-Tr mRNA degradation  
349 products were detected in the top of the gradient, which may arise from the lack of  
350 ribosome protection and/or the extended time of sample collection and treatment prior  
351 RNA extraction. The strong degradation observed for the *start* strain impeded the  
352 quantification of *aapA3*-Tr. For the G43A strain, the relative amount of *aapA3*-Tr mRNA  
353 in translating fractions was strongly reduced (approximately 4%, lanes 10 to 14, Figure  
354 4B and Figure 4 - figure supplement 2E) compared to the T107C strain. This result  
355 confirmed that the single G43A mutation was sufficient to prevent ribosome binding,  
356 consequently impairing translation of the toxin. Remarkably, a similar result was  
357 observed for the A28C and A40T suppressor mutations. The A40T mutation had the  
358 strongest effect with only 7% of *aapA3*-Tr associated with translating ribosomes,  
359 compared to 19% for the A28C strain (Figure 4B and Figure 4 - figure supplement 2C,  
360 D). *In vitro* translation assays (Figure 4 - figure supplement 1C) further confirmed that  
361 the A28C and A40T suppressor mutations, like the G43A mutant, act by reducing  
362 AapA3 translation efficiency.

363 Together, these results demonstrate that a single mutation within the 5'UTR  
364 either inside or outside the SD sequence, is able to overcome antitoxin absence by  
365 impeding toxin translation.

### 366 **The suppressor A28C and A40T mutations inhibit toxin translation by stabilizing** 367 **a SD-sequestering hairpin**

368 We next asked by which mechanism A28C and A40T mutations inhibit  
369 translation. Both substitutions lie in a single stranded region upstream of the minimal  
370 SD sequence (5'-AGGA-3'), which may be crucial for translation initiation (Figure 2).  
371 However, in both cases, a unique type of transversion mutation was selected (*i.e.*,  
372 A28T and A40C were not selected) suggesting that the mutations may act at the  
373 structure rather than at the primary sequence level. Indeed, secondary structure  
374 predictions with RNAfold algorithm (Gruber et al., 2008) suggested that both mutations

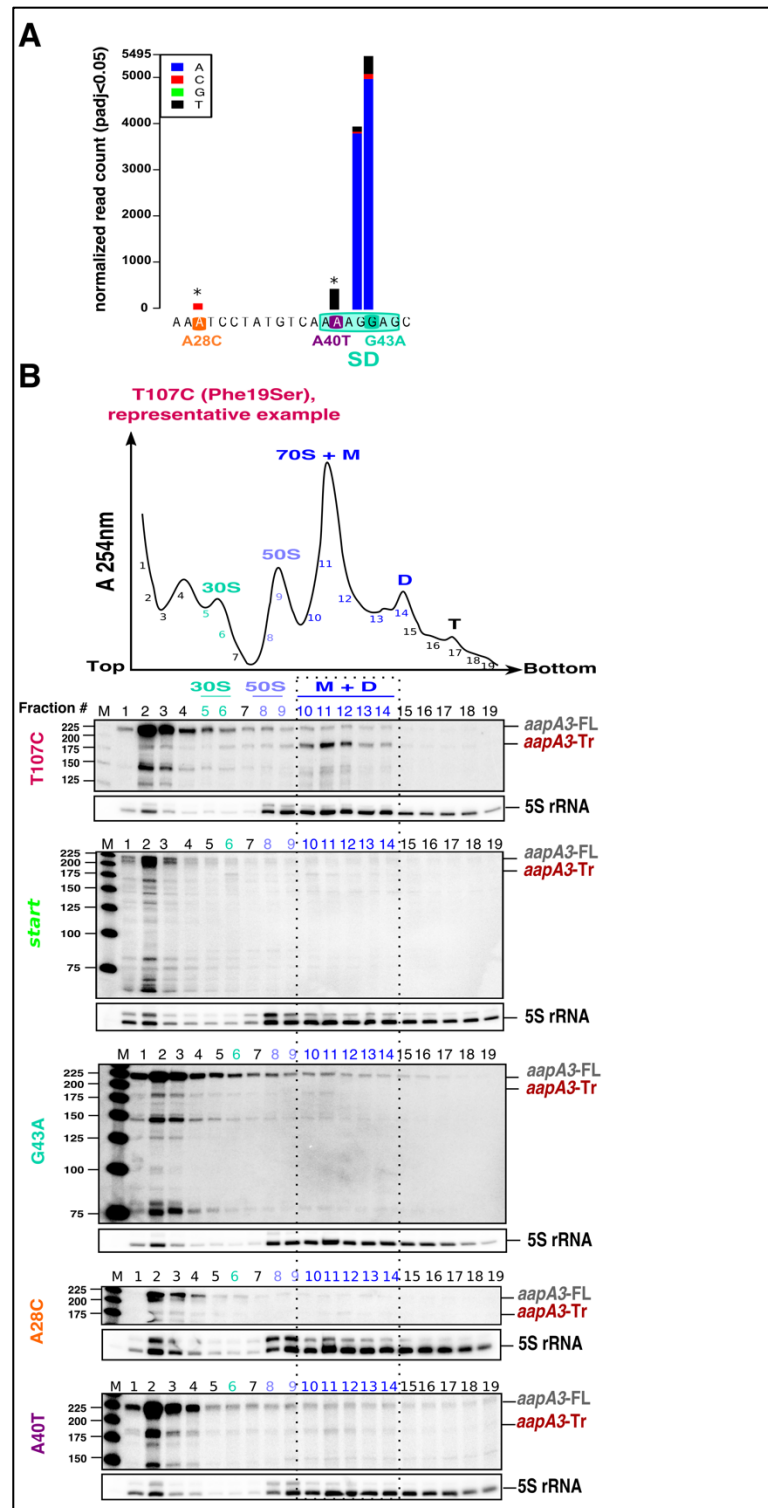

375  
376 **Figure 4. Single point suppressor mutations in the 5' UTR of the *aapA3* mRNA inhibit its**  
377 **translation.** (A) Nucleotide substitutions within the *aapA3* 5' UTR, which are significantly enriched  
378 (pajd≤0.05, “nucleotide-specific” analysis, see Material and Methods section) in pIsoA3\* compared to  
379 WT. Asterisks above the bars indicate transversion mutations. The SD sequence is boxed. (B) Cell  
380 lysates of the indicated *aapA3* variant strains were subjected to ultracentrifugation through a sucrose  
381 gradient. A representative A<sub>254nm</sub> profile of the T107C strain is shown. Peaks of the free 30S and 50S  
382 subunits, 70S ribosomes (free ribosomes and monosomes (M)), and polysomes (D, disomes; T,

383 trisomes) are indicated. RNA was extracted from each fraction and equal volumes of each fraction were  
 384 subjected to Northern blot analysis. The different transcripts *aapA3*-FL, *aapA3*-Tr, and 5S rRNA  
 385 (loading control) are indicated. The vertical dashed lines delineate the limits corresponding to 70S,  
 386 monosome and disome fractions.  
 387

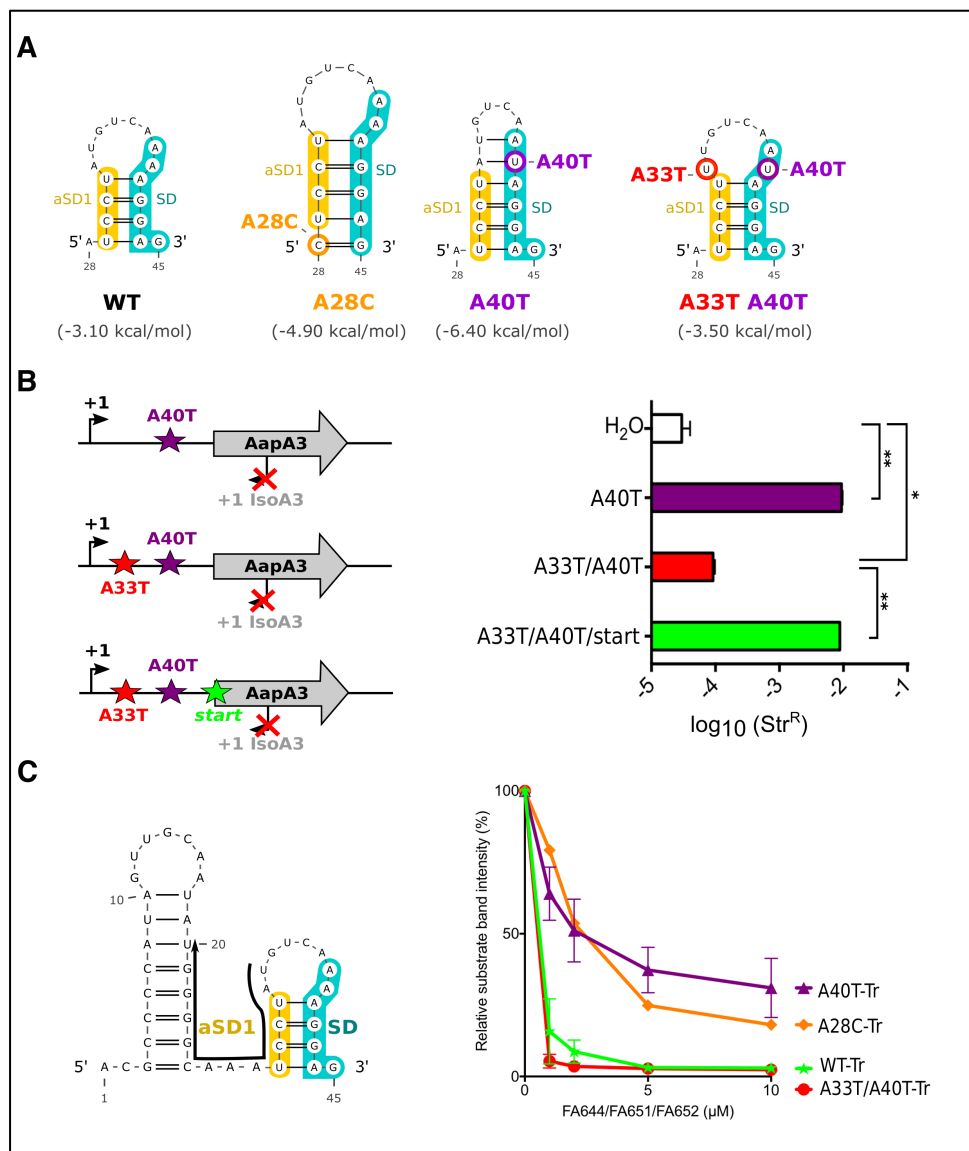

388  
 389 **Figure 5. The A28C and A40T mutations suppress toxicity through SD-sequestration. (A)**  
 390 Secondary structures involving the SD sequence were predicted using the same software as in Figure 2.  
 391 The A28C mutation (dark orange) generates an extra G-C base-pair; in the A40T mutant (purple), two  
 392 additional A-U pairs stabilize the hairpin; the A40T antagonist mutation A33T is shown in red; the SD  
 393 and the anti-SD (aSD1) sequences are shown in turquoise and in yellow, respectively. **(B)** (left) PCR  
 394 constructs used to assess the SD sequestering structure by transformation assay. (right) For each  
 395 transformation with the indicated PCR constructs, the number of Str<sup>R</sup> obtained per total number of  
 396 transformed cells was calculated and plotted on a log scale. Error bars represent s.d; *n*=3 biological  
 397 replicates. (\*\*\*)*P*<0.0001; (\*)*P*=0.001 according to unpaired *t*-test). **(C)** Left: The position of the  
 398 oligonucleotides (FA644 for WT and A40T; FA651 for A33T/A40T; and FA652 for A28C, see Table 4)

399 used in the RNase H protection assay is indicated as a black arrow on the first 45 nucleotides of the  
400 *aapA3* mRNA. Right: 30 fmol of internally labeled WT and mutated *aapA3*-Tr transcripts were  
401 incubated with 0 to 100 pmoles of each specific DNA oligonucleotide and subjected to digestion by *E.*  
402 *coli* RNase H1. Digestion products were analyzed on an 8% PAA denaturing gel. Substrate consumption  
403 was quantified as relative substrate band intensity, 100% corresponding to the intensity obtained in  
404 absence of oligonucleotide. Error bars represent the s.d; *n*=2 technical replicates.

405  
406 could stabilize a local hairpin in which the SD is sequestered by an upstream aSD  
407 sequence (anti-SD sequence 1 (aSD1), Figure 5A). Indeed, while the A28C suppressor  
408 transversion extended this hairpin by one G-C base-pair, the A40T mutation created  
409 two additional A-U base-pairs. To investigate whether this stabilization was responsible  
410 for the translation inhibition effect, we tested whether the combination of A33T and  
411 A40T mutations (see Figure 5A), which is expected to destabilize the stem-loop  
412 stability, restored a toxic phenotype. Due to this potential toxicity, a strain containing  
413 an additional mutation in the AapA3 start codon was also generated (A33T/A40T/*start*,  
414 Figure 5B). Transformation assay was performed as previously described (Figure 3B).  
415 As expected, the suppressor A40T mutation was not toxic (Figure 5B). However, a 2  
416 log-fold reduction in the number of Str<sup>R</sup> transformants was observed with the  
417 A33T/A40T construct (Figure 5B). This effect disappeared when the toxin start codon  
418 was mutated (A33T/A40T/*start*, Figure 5B) demonstrating that the toxicity comes from  
419 the AapA3 peptide synthesis. This approach could not be used to study the A28C  
420 suppressor mutation since the non-compensatory mutation would lie within the SD  
421 sequence. Therefore, we tested the SD accessibility for all mutants (A40T, A28C,  
422 A40T/A33T) *in vitro* by performing an RNase H/oligonucleotide assay (Figure 5C, and  
423 Figure 5 - figure supplement 1). Compared to the WT and the A33T/A40T mutant, a  
424 reduced oligonucleotide accessibility was observed for both A28C and A40T *aapA3*-  
425 Tr RNAs, demonstrating that both mutations inhibit toxin expression by reducing SD  
426 accessibility.

427 Altogether these results demonstrate that both suppressor mutations are  
428 preventing translation initiation by stabilizing the SD sequestration within a local RNA  
429 hairpin instead of acting at the sequence level.

430

### 431 **A second SD-sequestering hairpin is embedded within the *aapA3* ORF**

432 A synonymous substitution (T78C) that converts the Serine codon UCU into UCC was  
433 also selected in our suppressor selection. The presence of this mutation was intriguing



434 since it is located 27 nt after the start codon and it does not affect the amino acid  
435 sequence. To understand its potential effect on toxin expression, we constructed a  
436 strain containing this mutation and the plsoA3\* mutation. Northern blot analysis  
437 showed that the T78C strain contains similar amounts of both *aapA3*-FL and -Tr mRNA  
438 isoforms than the other A28C and A40T suppressor strains (Figure 4 - figure  
439 supplement 1). We next tested the translatability of AapA3 *in vivo* by performing  
440 polysome fractionation coupled to Northern blot analysis. The percentage of *aapA3*-Tr  
441 found in the monosome and disome fractions of the T78C strain (Figure 6A and Figure  
442 4 - figure supplement 2) was lower than that observed for the control T107C strain  
443 (34% vs 73%), but significantly higher than the one observed with the two A28C and  
444 A40T suppressors (Figure 4B). *In vitro* translation assays confirmed these results  
445 (Figure 4 - figure supplement 1), demonstrating that the T78C suppressor acts by  
446 inhibiting AapA3 translation.

447 Secondary structure prediction revealed another putative SD-sequestering  
448 hairpin involving an aSD sequence (aSD2) embedded within the AapA3 ORF (Figure  
449 6B). As for the two other A28C and A40T suppressor mutations, the T78C transition  
450 was expected to stabilize this hairpin by replacing a G-U by a G-C pair. To address the  
451 accessibility of this region, an RNase H protection assay was performed, using the  
452 FA633 oligonucleotide (Figure 6B). Remarkably, a strong reduction in SD accessibility  
453 was observed for the T78C RNA compared to the WT (Figure 6C and 6D). Thus, a  
454 single hydrogen bond is sufficient to stabilize the sequestration of the SD sequence  
455 and to suppress toxicity. Importantly, despite being located within the AapA3 coding  
456 region, the T78C suppressor acts at the mRNA folding level.

457 Sequence conservation analysis of the AapA3 coding region in 49 *H. pylori*  
458 strains (Figure 6 - figure supplement 1) revealed that the serine codon at position 9 is  
459 one of the most highly conserved codons of the peptide, indicating a crucial role of this  
460 sequence, likely in the sequestration of the SD sequence. Only the UM066 strain  
461 (highlighted in pink in Figure 6 - figure supplement 1) possesses a proline at this  
462 position, which probably abolishes peptide toxicity by disrupting the alpha-helix  
463 structure of the toxin (Masachis et al., 2018).

464  
465  
466

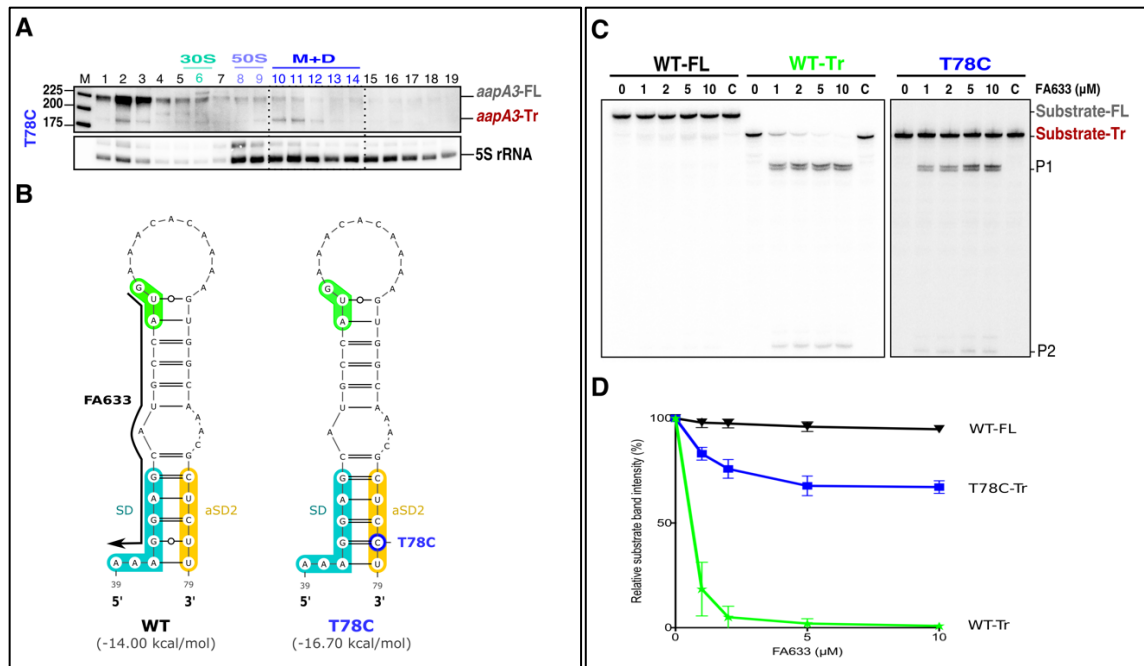

467

468

469

**Figure 6. A synonymous mutation located within the toxin ORF inhibits *aapA3* mRNA translation via SD sequestration.**

470

**(A)** The cell lysate of T78C strain was subjected to ultracentrifugation through a sucrose gradient. RNA was analyzed as in Figure 4. The different transcripts *aapA3*-FL, *aapA3*-Tr, and 5S rRNA (loading control) are indicated. M+D, monosomes + disomes. **(B)** Prediction of the secondary structure involving the second aSD sequence. The black arrow represents the complementary sequence of the DNA oligonucleotide used in the assay. The T78C mutation is shown in dark blue, SD sequence in turquoise, anti-SD sequence in yellow and start codon in green. **(C)** A typical RNase H protection assays is shown. A total of 30 fmol of internally labeled *aapA3*-FL and *aapA3*-Tr RNA (WT or T78C) were incubated in presence of 0 to 100 pmoles of DNA oligonucleotide (FA633) and subjected to digestion by *E. coli* RNase H1. Lane C contains only the labeled substrate in absence of the enzyme. Two digestion products, P1 and P2 are indicated **(D)** Substrate consumption was quantified as the relative substrate band intensity and plotted as a function of DNA oligonucleotide concentration. Error bars represent the s.d;  $n=2$  technical replicates.

482

**Working Model**

484

We have shown that mutations in aSD1 and aSD2 sequences suppress toxicity by stabilizing two mutually exclusive short hairpins that inhibit toxin translation (Figure 7). These stabilized hairpins are formed in the *aapA3*-Tr but not in the *aapA3*-FL (Figure 7 - figure supplement 1), explaining why they inhibit translation without affecting the stability of the full-length form. Interestingly, our FASTBAC-Seq approach revealed that, out of thirteen possible aSD sequences present in the *aapA3* mRNA (Figure 7 - figure supplement 1), only two could be mutated to suppress toxicity. Our results suggest that, in the WT context, these hairpins are not stable enough and are

491

492 exclusively formed transiently during transcription. We propose that they act as  
 493 functional metastable structures (MeSt1 and MeSt2, Figure 7), i.e. they form co-  
 494 transcriptionally and sequentially to prevent premature toxin expression before a third  
 495 aSD (aSD3) traps the *aapA3*-FL mRNA into a highly stable and translationally inert  
 496 conformation (Figure 7).  
 497

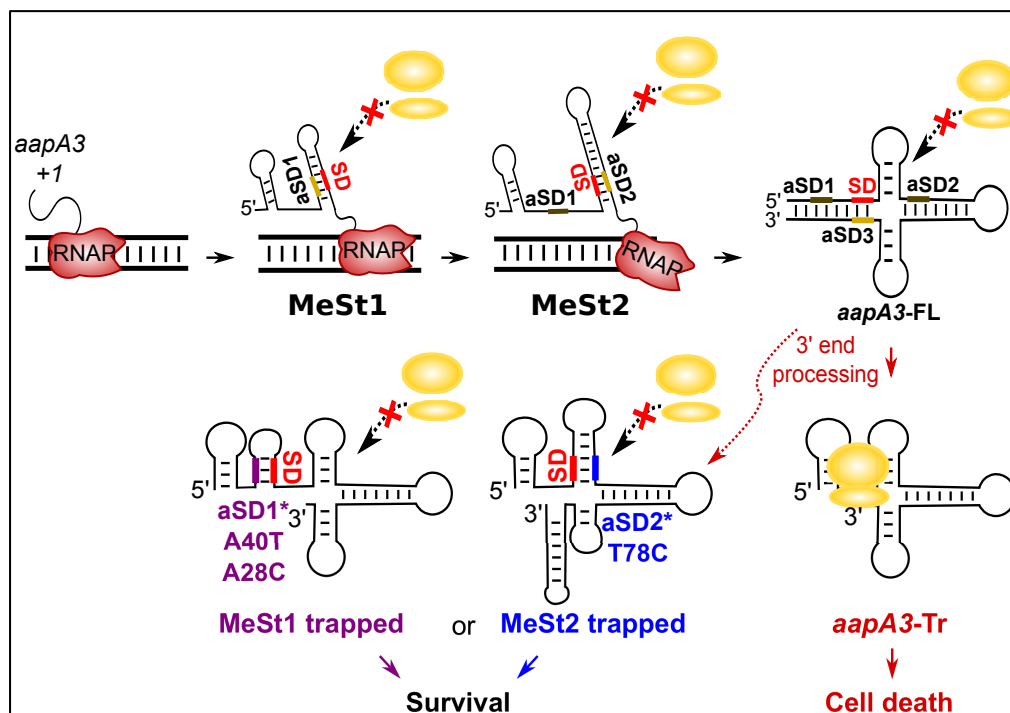

498  
 499 **Figure 7. Working model of the *aapA3* co- and post-transcriptional regulation.** Co-  
 500 transcriptional folding of the *aapA3* mRNA leads to the generation of two successive SD-sequestering  
 501 hairpins, which constitute metastable structures (MeSt) temporarily impeding ribosome access during  
 502 transcription. The RNA polymerase is shown in red. Upon transcription termination, the *aapA3* full-  
 503 length transcript (*aapA3*-FL) folds into a translationally inert conformation involving a 5'-3'-end long-  
 504 distance interaction (LDI) in which the SD is sequestered by the aSD3 motif. A 3'-end nucleolytic  
 505 truncation leads to the formation of *aapA3*-Tr, which is translationally active. In absence of IsoA3, its  
 506 translation leads to cell death. We showed that the suppressor mutations A40T, A28C (purple) and T78C  
 507 (blue) stabilize the metastable hairpins in the truncated isoform (involving the aSD1 and aSD2  
 508 sequences, respectively), leading to inhibition of *aapA3*-Tr translation. The suppressor strains can thus  
 509 survive even in absence of IsoA3. The two successive MeSt structures act as thermodynamic traps to  
 510 freeze the mRNA into translationally inert conformations.

511

## 512 DISCUSSION

513 How bacteria modulate gene expression via RNA structure has been a fascinating  
 514 topic for the last 30 years. This regulation is often achieved at the translation initiation

515 step through the sequestration of the SD sequence in stable RNA hairpins that prevent  
516 ribosome binding to the RBS of the mRNA (Duval et al., 2013, 2015; Meyer, 2017b).  
517 Although recent advances using *in vivo* probing at the genome scale have confirmed  
518 that translation efficiency strongly correlates with the mRNA structure around the RBS  
519 (Mustoe et al., 2018), little is known about the influence of co-transcriptional folding on  
520 translation. Bacteria could, in principle, reduce or delay the translation of a specific  
521 mRNA by playing with its secondary structure while the mRNA is being made (Lai,  
522 Proctor, & Meyer, 2013; Zhu & Meyer, 2015). In this article, we identified two functional  
523 RNA hairpins within a type I toxin-encoding mRNA for which a tight control of  
524 translation is essential. We propose that these hairpins correspond to metastable  
525 structures that form sequentially and transiently to occlude the SD accessibility during  
526 mRNA synthesis.

527

#### 528 **FASTBAC-Seq uses toxin lethality to identify suppressor mutations**

529 To date, most studies on TA systems, including our previous work (Arnion et al., 2017),  
530 used artificial expression systems to characterize the effects of toxin expression. The  
531 use of such overexpression vectors is often a source of misinterpretations, as toxic  
532 proteins may not be found at such high concentrations under physiological conditions.  
533 To study the AapA3 toxin expression at the chromosomal level, we inactivated the  
534 endogenous IsoA3 antitoxin promoter as previously described for IsoA1 (Arnion et al.,  
535 2017). However, we were unable to obtain a viable strain without obtaining additional  
536 mutations in the toxin-encoding gene. Suppressor mutations have been also reported  
537 in *B. subtilis* for two chromosomally-encoded type I toxins with killer activity (*txpA/RatA*  
538 (Silvaggi et al., 2005) and *bsrG/SR4* (Jahn et al., 2012)). Strikingly, a lethality at the  
539 chromosomal level has not been reported for chromosomally-encoded TA loci in Gram-  
540 negative bacteria. Indeed, the killer activity observed for the plasmid-encoded *hok/Sok*  
541 TA system was even believed to be not conserved for the chromosomally-encoded  
542 homologs (Pedersen & Gerdes, 1999). Interestingly, most of the *hok/Sok* homologs  
543 (*hokA*, *C* and *E*) in *E. coli* are inactivated by the presence of insertion elements located  
544 close to the toxin ORF (Pedersen & Gerdes, 1999). This observation, together with  
545 studies showing a differential expression of several TA systems in response to various  
546 stresses (e.g., temperature shift, oxidative stress, starvation) (Harms et al., 2018),  
547 suggests that chromosomally-encoded TA systems may not be involved in a

548 bactericidal activity, but rather, in a reversible growth arrest in response to a specific  
549 stress. Conversely, our results clearly demonstrate that, in line with the bactericidal  
550 activity observed for the overexpressed AapA1 toxin (Arnion et al., 2017), the  
551 chromosomal expression of the AapA3 toxin is constitutive and lethal in absence of the  
552 IsoA3 antitoxin. Consequently, we took advantage of this lethality to select suppressors  
553 and developed the FASTBAC-Seq method to rapidly identify hundreds of intragenic  
554 suppressor mutations with nucleotide resolution (Masachis et al., 2018).

555

### 556 **A single-nucleotide substitution is sufficient to impede toxin translation**

557 The FASTBAC-Seq method revealed a wide range of unanticipated *cis*-encoded  
558 toxicity determinants, affecting either the toxic activity of the protein (described in  
559 (Masachis et al., 2018), or its expression (this study). Among the mutations affecting  
560 the toxin mRNA expression, we identified five single-nucleotide substitutions able to  
561 inhibit the translation of AapA3 mRNA without affecting its stability. Three of them were  
562 located in the SD sequence. The most highly enriched mutations substituted the  
563 guanines at positions 42 and 43 by either an adenine, a cytosine, or an uridine. This  
564 revealed 5'-AGG-3' and 5'-GGA-3' as the minimal functional SD motifs allowing AapA3  
565 translation, in agreement with the previously identified *H. pylori* SD consensus  
566 sequence (5'-AAGGA-3') (C. M. Sharma et al., 2010). The third mutation (A40T) was  
567 much less enriched, and remarkably, only the transversion from an adenine to a  
568 thymine was selected. Another transversion mutation (A28C) was selected 14 nt  
569 upstream of the SD sequence. The fact that only transversion mutations were selected  
570 at these two positions indicated that the nature of the substituted nucleotide was  
571 important, suggesting that they may not directly act at the sequence, but rather at the  
572 structure level. Indeed, our results demonstrated that the A28C and A40T mutations  
573 create, respectively, one or two additional base-pair(s) within a stem-loop structure  
574 formed by the pairing between the SD sequence and an upstream complementary aSD  
575 sequence (aSD1, 5'-UCCU-3'). Destabilizing the A40T mutated stem by mutating the  
576 complementary nucleotide (A33T) restored toxicity, clearly showing that the A40T  
577 mutation, despite being located within the SD sequence, acts at the mRNA structural  
578 level and not at the sequence level.

579 Interestingly, the T78C mutation revealed the existence of a second aSD  
580 sequence (aSD2) located downstream the SD sequence, within the toxin coding region.

581 This synonymous substitution (UCU→UCC, Ser codon at position 9) creates a perfect  
582 aSD sequence (5'-CUCCU-3'). Although this mutation could potentially create a rare  
583 codon reducing toxin translation efficiency, we did not favor this hypothesis since the  
584 less frequently used Ser codon in *H. pylori* is UCG (Atherton, Sharp, & Lafay, 2000).  
585 Interestingly, synonymous mutations close to the translation initiation region (TIR) have  
586 also been shown to influence gene expression by modulating the stability of mRNA  
587 folding rather than by acting at the codon usage level (Kudla, Murray, Tollervey, &  
588 Plotkin, 2009). In addition, a strong codon bias has also been observed within the first  
589 15 codons, which avoids tight mRNA structure close to the TIR region (Bentele, Saffert,  
590 Rauscher, Ignatova, & Bluthgen, 2014; Bhattacharyya et al., 2018). Here, we showed  
591 that despite the presence of up to thirteen CU-rich sequences in the AapA3 mRNA,  
592 only mutations in the sequences closest to the SD could be selected, reflecting a  
593 distance-dependence of these translation regulatory elements. A similar aSD  
594 sequence (5'-UCCU-3') has been identified in the coding sequence of the *gnd* gene in  
595 *E. coli* (Carter-Muenchau & Wolf, 1989). Interestingly, displacing this aSD sequence  
596 from its natural position (codon 66) to a more proximal position (codon 13) greatly  
597 increased its capacity to inhibit translation.

### 598 **Suppressor mutations reveal functional metastable structures acting co-** 599 **transcriptionally to impede premature toxin translation**

600 The three mutations studied here (A28C, A40T and T78C) act post-transcriptionally  
601 after the 3' end processing by stabilizing SD-sequestering hairpin structures.  
602 Importantly, these suppressor mutations do not interfere with the folding pathway of  
603 the full-length mRNA, neither affecting its transcription, stability, nor its 3'-end  
604 maturation, indicating that they exclusively act on the active, truncated, AapA3 mRNA  
605 form (Figure 7). Interestingly, these local hairpins were previously predicted to form  
606 during the co-transcriptional folding pathway of several AapA mRNAs (Arnion et al.,  
607 2017). Now, our FASTBAC-seq approach reveals that these structures are functional,  
608 *i.e.* they transiently form during transcription to prevent toxin translation before the FL  
609 is made. Indeed, stabilizing these hairpins inhibits translation of the *aapA3-Tr*. This  
610 temporal control of gene expression is achieved through the sequential formation of  
611 two RNA hairpin structures that mask the SD sequence via CU-rich elements. In the  
612 full-length mRNA, these structures are replaced by a more stable one involving an LDI  
613 between both ends of the transcript. Similar to the *hok* mRNA, this final mRNA structure

614 is so stable that its translational activation requires a 3'-end processing removing the  
615 aSD3 sequence element. The highly stable structure of the *aapA3*-FL mRNA is also  
616 similar to the cloverleaf-like structure present in the 5' UTR of the MS2 coliphage  
617 maturation gene (Groeneveld, Thimon, & van Duin, 1995). Interestingly, in this case, it  
618 may take up to several minutes for the mRNA to be synthesized and properly folded  
619 (van Meerten, Girard, & van Duin, 2001), explaining the need of functional transient  
620 structural intermediates preventing premature gene expression.

621 The selection of three stabilizing mutations suggests that the thermodynamic stability  
622 of such SD-sequestering stem-loops in the WT context is not sufficient to inhibit the  
623 translation of the active AapA3 mRNA form. Instead, our results suggest that in the WT  
624 situation, these SD-sequestering hairpins (MeSt1 and MeSt2, Figure 7) are only  
625 transiently formed to co-transcriptionally impede the premature toxin translation. This  
626 transient character is essential to ensure the proper transcription termination and  
627 folding of the full-length mRNA, and it is achieved by hierarchically increasing  
628 thermodynamic stabilities (Figure 7 - figure supplement 2). Importantly, the suppressor  
629 mutations do not provide enough stabilization to impede the formation of the next most  
630 stable structure. Indeed, the A40T mutated MeSt1 has an energy of -21.10 kcal/mol,  
631 while that of the WT MeSt2 is -29.30 kcal/mol (Figure 7 - figure supplement 2). This  
632 may explain why the SD-sequestering mutations do not interfere with its co-  
633 transcriptional folding pathway and why the last SD-aSD3 is finally formed in the  
634 mutants.

635 The importance of metastable RNA structures in the AapA3 mRNA is attested  
636 by the strict conservation of the UCU Serine codon at position 9. As our results have  
637 shown, a synonymous UCC codon at this position (T78C mutation) would inhibit the  
638 AapA3 toxin expression, rendering the TA locus non-functional and probably promoting  
639 its rapid loss. Our study represents the first *in vivo* evidence of the existence of  
640 sequential RNA metastable structures that avoid, directly but transiently, the co-  
641 transcriptional translation of a toxin-encoding mRNA.

642 The formation of metastable structures has been reported in several RNA-  
643 mediated regulatory pathways, including viral RNA replication (Repsilber et al., 1999),  
644 RNA catalysis (Pan & Woodson, 1998), RNA editing (Linnstaedt, Kasprzak, Shapiro,  
645 & Casey, 2006), and ribosome biogenesis (I. M. Sharma et al., 2018). They are usually  
646 described as folding intermediates that work in a hierarchical manner to help an RNA

647 molecule reaching its functional conformation (*i.e.*, most thermodynamically stable  
648 conformation). A nice example of such metastable structures has been reported for the  
649 regulation of the *hok/Sok* type I TA system in *E. coli*. In this pioneering work, they  
650 showed that the formation a metastable hairpin ensures the proper folding of the Hok  
651 mRNA into a translationally inert conformation (Møller-Jensen, Franch, & Gerdes,  
652 2001; Nagel, Gulyaev, Gerdes, & Pleij, 1999). Although this metastable hairpin is  
653 located at the 5' end of the mRNA, it does not directly mask the SD sequence. Instead,  
654 it favors a conformation in which the SD is sequestered by a downstream anti-SD.  
655 Other metastable structures are directly involved in the activation or inhibition of gene  
656 expression (Zhu & Meyer, 2015), as exemplified by the structures reported in the Trp  
657 operon leader, the SAM riboswitch and the 5' UTR of the MS2 phage (Zhu & Meyer,  
658 2015). The metastable structures of *aapA3* are more reminiscent of the latter example  
659 (van Meerten et al., 2001), except that in the case of MS2, the transient structure allows  
660 translation to occur before the cloverleaf-like structure is formed. Nevertheless, in both  
661 cases, a functional transient RNA structure exerts a temporal control of translation,  
662 either negatively or positively.

## 663 **Conclusion**

664 Although the coupling between transcription and translation in bacteria plays important  
665 roles in gene expression (Kriner, Sevostyanova, & Groisman, 2016), it can be harmful  
666 in the case of toxin-encoded mRNAs. Thus, the metastable RNA structures identified  
667 in the present study are essential to uncouple transcription and translation processes  
668 and allow the presence of type I TA systems on bacterial chromosomes. Although  
669 transient RNA structures can be predicted *in silico* (Meyer, 2017), their *in vivo*  
670 characterization remains challenging. Several high-resolution methods have been  
671 recently reported for analyzing the co-transcriptional folding of regulatory RNAs, both  
672 *in vitro* (Uhm, Kang, Ha, Kang, & Hohng, 2018; Watters, Strobel, Yu, Lis, & Lucks,  
673 2016) and *in vivo* (Incarnato et al., 2017). These complementary techniques may be  
674 useful to analyze the formation of these metastable hairpins in real-time.

675



## 676 **MATERIALS AND METHODS**

### 677 **Bacterial Strains, Plasmids and Growth conditions**

678 The *H. pylori* strain used in this study is the 26695 reference strain (Tomb et al., 1997).  
679 Strains were grown on Columbia agar plates supplemented with 7% horse blood and  
680 Dent selective supplement (Oxoid, Basingstoke, UK) for 24 to 48 h depending on the  
681 strain. Liquid cultures were performed in Brain-Heart Infusion (BHI) medium (Oxoid)  
682 supplemented with 10% fetal bovine serum (FBS) and Dent. *H. pylori* plates and liquid  
683 cultures were incubated at 37°C under microaerobic conditions (10% CO<sub>2</sub>, 6% O<sub>2</sub>, 84%  
684 N<sub>2</sub>) using an Anoxomat (MART microbiology) atmosphere generator. Plasmids used  
685 for cloning were amplified in *Escherichia coli* TOP10 strain, which was grown in Luria-  
686 Bertani (LB) media, supplemented either with kanamycin (50 µg.mL<sup>-1</sup>),  
687 chloramphenicol (30 µg.mL<sup>-1</sup>) or ampicillin (100 µg.mL<sup>-1</sup>). For *H. pylori* mutant selection  
688 and culture, antibiotics were used at the following final concentrations: 20 µg.mL<sup>-1</sup>  
689 kanamycine (Sigma), 8 µg.mL<sup>-1</sup> chloramphenicol (Sigma), 10 µg.mL<sup>-1</sup> streptomycin and  
690 10 µg.mL<sup>-1</sup> erythromycin.

691

### 692 **Molecular techniques**

693 Molecular biology experiments were performed according to standard procedures and  
694 the supplier recommendations. High Purity Plasmid Miniprep Kit (Neo Biotech) and  
695 Quick Bacteria Genomic DNA extraction Kit (Neo Biotech) were used for plasmid  
696 preparations and *H. pylori* genomic DNA extractions, respectively. PCR were  
697 performed either with Dream Taq DNA polymerase (Thermo Fisher Scientific), or with  
698 Phusion High-Fidelity Hot Start DNA polymerase (Thermo Fisher Scientific) when the  
699 product required high-fidelity polymerase. Site-directed mutagenesis PCR was  
700 performed with the PfuUltra High-Fidelity DNA Polymerase (Agilent). All  
701 oligonucleotides used in this study are shown in Table 4.

702

### 703 **RNA extraction**

704 For RNA extraction, bacterial growth was stopped at the desired OD<sub>600nm</sub> by adding  
705 650 µl cold Stop Solution (95% ethanol, 5% phenol pH 4.5) to 5 ml of culture, which  
706 was placed on ice. Cells were then centrifuged for 10 min at 3,500 rpm and 4°C, and  
707 the pellets were stored at -80°C. Cell pellets were resuspended in 600 µl Lysis Solution

708 (20 mM NaAc pH 5.2, 0.5% SDS, 1 mM EDTA) and added to 600  $\mu$ l hot phenol pH 5.2.  
709 After incubation for 10 min at 65°C, the mixture was then centrifuged for 10 min at  
710 13,000 rpm and room temperature. The aqueous phase was next transferred to a  
711 phase-locked gel tube (Eppendorf) with an equal volume of chloroform and centrifuged  
712 for 10 min at 13,000 rpm and room temperature. Total RNA was then precipitated from  
713 the aqueous phase by adding 2.5 volumes of ethanol 100% and 1/10 volume of 3 M  
714 NaAc pH 5.2. After centrifugation for 30 min at 13,000 rpm and 4°C, the supernatant  
715 was discarded and the pellet was washed with 75% ethanol. Finally, the supernatant  
716 was discarded and the RNA pellet air-dried and resuspended in H<sub>2</sub>O. For RNA half-life  
717 determinations, rifampicin (Sigma, prepared at 34 mg.ml<sup>-1</sup> in methanol) was added to  
718 the culture at a final concentration of 80  $\mu$ g.ml<sup>-1</sup> and cells were harvested at the desired  
719 time points. A culture where rifampicin was replaced by the same volume of methanol  
720 served as a non-treated control.

721

## 722 Northern Blot

723 For Northern blot analysis, 1 to 10  $\mu$ g RNA were separated on an 8% polyacrylamide  
724 (PAA), 7M urea, 1X Tris Borate EDTA (TBE) gel. RNA was transferred to a nylon  
725 membrane (Hybond<sup>TM</sup>-N, GE Healthcare Life Science) by electroblotting in TBE 1X at  
726 8V and 4°C overnight. Then, RNA was cross-linked to the membrane by UV irradiation  
727 (302 nm) for 2 min in a UV-crosslinker and hybridized with 5'-labeled ( $\gamma$ <sup>32</sup>P)  
728 oligodeoxynucleotides in a modified Church Buffer (1 mM EDTA, 0.5 M NaPO<sub>4</sub> pH 7.2,  
729 7% SDS) overnight at 42°C. Membranes were washed two times 5 minutes in 2X SSC,  
730 0.1% SDS, and revealed using a Pharos FX phosphorimager (Biorad). For riboprobes,  
731 a DNA template containing a T7 promoter sequence was amplified by PCR from *H.*  
732 *pylori* 26695 genomic DNA as template. *In vitro* transcription was performed as  
733 described in the MaxiScript T7 Transcription Kit (Ambion) in the presence of 50  $\mu$ Ci of  
734 <sup>32</sup>P- $\alpha$ -UTP and 1 mM cold UTP and purified on a Sephadex G25 column (GE  
735 Healthcare). Hybridization was performed in the modified Church Buffer at 65°C and  
736 the membrane was washed two times 5 min in 2X SSC, 0.1% SDS at 65°C. For the  
737 detection of *aapA3* mRNA species the <sup>32</sup>P-labelled primer FD38 was used. To detect  
738 the *aapA3* mutants sequestering the SD region (where the primer FD38 binds), a  
739 riboprobe corresponding to the 5' UTR of the mRNA was transcribed from a PCR  
740 fragment containing the T7 promoter and amplified with the FA170/FA11 primer pair.

741 IsoA3 RNA was detected with a riboprobe corresponding to the *aapA3*-Tr RNA species  
742 transcribed from a PCR fragment containing the T7 promoter and amplified with the  
743 primer pair FA170/FA173.

#### 744 ***In vitro* transcription and translation assays**

745 For *in vitro* synthesis of the *aapA3* and IsoA3 RNAs, DNA templates were amplified  
746 from *H. pylori* 26695 genomic DNA using primer pairs: FA170/FA175 (*aapA3*-FL),  
747 FA170/FA173 (*aapA3*-Tr), FD11/FD17 (IsoA3), each forward primer carrying a T7  
748 promoter sequence (see primer list, Table 4). *In vitro* transcription was carried out  
749 using the MEGAscript® T7 Transcription Kit (Ambion #AM1334) according to the  
750 manufacturer's protocol. After phenol:chloroform extraction followed by isopropanol  
751 precipitation, the RNA samples were desalted by gel filtration using a Sephadex G-25  
752 (GE Healthcare) column. For *in vitro* translation of the *aapA3*-FL and *aapA3*-Tr  
753 mRNAs, 0.5 µg of RNA was added to the *E. coli* S30 Extract System for Linear  
754 Templates Kit (Promega #L1030) as previously described (C. M. Sharma et al., 2010).

#### 755 ***In vitro* structure probing**

756 20 pmol of both *aapA3*-FL and *aapA3*-Tr transcripts were dephosphorylated with 10 U  
757 of calf alkaline phosphatase (CIP) at 37°C for 1 h. RNA was isolated by phenol  
758 extraction and precipitated overnight at -20°C in the presence of 30:1 ethanol: 0.3M  
759 NaOAc pH 5.2 and 20 µg GlycoBlue™. The dephosphorylated RNA was then 5' end-  
760 labelled with 10 pmol <sup>32</sup>P-γ-ATP using the T4 polynucleotide kinase (PNK) for 30 min  
761 at 37° C. Unincorporated nucleotides were removed using a MicroSpin™ G-25  
762 column and labelled RNA was purified on an 8% PAA gel containing 7 M urea and 1X  
763 TBE. Upon visualization of the labelled RNA, the band corresponding to the RNA  
764 species of interest was cut from the gel and eluted overnight at 4°C under shaking in  
765 750 µl RNA elution buffer (0.3M NH<sub>4</sub>Ac, 0.1% SDS, 1mM EDTA). RNA was extracted  
766 by Phenol/Chloroform/Isoamyl alcohol (25:24:1 v/v), and precipitated by ethanol (2.5V),  
767 pellets were washed and resuspended in 50 µl H<sub>2</sub>O and stored at -20°C.

768 Before use, each *in vitro* transcribed RNA was denatured by incubation at 90°C  
769 for 2 min in the absence of magnesium and salt, then chilled on ice for 1 min, followed  
770 by a renaturation step at room temperature for 15 min in 1X Structure Buffer (10 mM  
771 Tris-HCl pH 7.0, 10 mM MgCl<sub>2</sub>, 100 mM KCl). Structure probing analyses were  
772 performed as described previously (Darfeuille, Unoson, Vogel, & Wagner, 2007; C. M.

773 Sharma et al., 2010; C. M. Sharma, Darfeuille, Plantinga, & Vogel, 2007), using 0.1  
774 pmol of 5' end-labeled RNA. To determine the secondary structure of RNA, 1  $\mu$ l RNase  
775 T1 (0.01 U. $\mu$ l<sup>-1</sup>; Ambion) was added to the labeled RNA and incubated in 1X  
776 Sequencing Buffer (20 mM Sodium Citrate, pH 5.0, 1 mM EDTA, 7M Urea) for 5 min  
777 at 37°C. Lead acetate (5 mM final concentration) digestions of both *aapA3-Tr* and  
778 *aapA3-FL* were done in the absence or in the presence of 2-10-fold excess of cold  
779 IsoA3 RNA. All reactions were stopped by adding 10  $\mu$ l of 2X Loading Buffer (95%  
780 formamide, 18 mM EDTA, Xylene Blue and Bromophenol Blue. Cleaved fragments  
781 were then analyzed on an 8% denaturing PAA gel containing 7M urea and 1X TBE.  
782 Gels were dried for 45 min at 80°C, and revealed using a Pharos FX phosphorimager  
783 (Biorad).

784

### 785 **RNase H1/oligonucleotide accessibility assay**

786 Internally-labelled transcripts were *in vitro*-transcribed using the MAXIscript® T7  
787 Transcription Kit (Ambion #AM1312) in presence of 2.2  $\mu$ M  $\alpha$ -<sup>32</sup>P-UTP according to the  
788 manufacturer's protocol. Labeled RNA was purified on an 8% PAA gel containing 7 M  
789 urea and 1X TBE, eluted overnight at 4°C under shaking in 750  $\mu$ l elution buffer (0.1  
790 M NaOAc pH 5.2, 0.1% SDS). RNA was desalted and concentrated by ethanol  
791 precipitation, pellets were resuspended in 100  $\mu$ l H<sub>2</sub>O. Approximately 30 fmol of RNA  
792 were used for RNase H/oligonucleotide accessibility assays. Before use, each *in vitro*-  
793 transcribed RNA and DNA oligonucleotides were denatured as described for structure  
794 probing. Next, DNA oligonucleotides complementary to the region around the SD  
795 sequence (FA633 for WT and T78C (aSD2) mRNA; FA644 for A40T mRNA (aSD1);  
796 FA651 for the double mutant A33T/A40T mRNA (aSD1); and FA652 for A28C mRNA)  
797 were added to a final concentration of 0 to 10  $\mu$ M. Reactions were adjusted to a final  
798 volume of 10  $\mu$ l with H<sub>2</sub>O and incubated for 30 min at 30°C in the presence or absence  
799 (control) of 0.25 U *E. coli* RNase H1 (Ambion #AM2293). Reactions were then stopped  
800 by addition of 10  $\mu$ l of 2X Loading Buffer (95% formamide, 18 mM EDTA, Xylene Blue  
801 and Bromophenol Blue). Cleaved fragments were analyzed on an 8% denaturing PAA  
802 gel containing 7M urea and 1X TBE. Gels were dried 45 min at 80°C, and revealed  
803 using a Pharos FX phosphorimager (Biorad).

804

## 805 ***H. pylori* chromosomal manipulation techniques**

806 All mutant *H. pylori* strains listed in Table 1 were generated by chromosomal  
807 homologous recombination of PCR-generated constructs, introduced by natural  
808 transformation, as previously described (Masachis et al., 2018). In all cases, constructs  
809 contained  $\approx$  400 nt of the up- and downstream chromosome regions of the target gene,  
810 flanking the DNA fragment to be introduced (*i.e.*, antibiotic resistance marker to  
811 generate deletions or a WT copy of the target gene for complementation). DNA  
812 fragments of interest were previously cloned in *E. coli* vectors to avoid *H. pylori* WT  
813 genomic DNA (gDNA) contamination (see '*aapA3/IsoA3* locus sub-cloning in *E. coli*'  
814 section below). Constructs were generated by PCR assembly of PCR products  
815 amplified from the plasmids listed in Table 2 with the oligonucleotides shown in Table  
816 4. Prior to transformation, *H. pylori* strains (number of cells corresponding to 1 OD<sub>600nm</sub>)  
817 were grown on non-selective CAB plates. After 4 hours incubation at 37°C under  
818 microaerobic conditions, 1  $\mu$ g of PCR assembly product was added to the cells and  
819 plates were incubated for another 16 hours. Transformed cells were then selected on  
820 plates supplemented with the appropriate antibiotics and incubated for 4-6 days until  
821 isolated colonies appeared. Genomic DNA from transformants was purified using the  
822 Quick Bacteria Genomic DNA extraction Kit and subjected to PCR and Sanger  
823 sequencing for mutant validation.

824

## 825 **Deletion of the *aapA3/IsoA3* locus using the *rpsL<sub>CJ</sub>-erm* counterselection marker**

826 The counterselection cassette *rpsL<sub>CJ</sub>-erm* was used to generate an *H. pylori* 26695  
827 strain deleted for the *aapA3/IsoA3* locus following the protocol described in (Masachis  
828 et al., 2018). First, the 26695 *H. pylori* strain used in this study was modified in order  
829 to become resistant to streptomycin. To this end we introduced by homologous  
830 recombination a mutation (K43R) in the *rpsL* gene coding for the small S12 ribosomal  
831 protein (Masachis et al., 2018). Then, up- and downstream fragments to the locus were  
832 amplified with the primer pairs FA406/FA407 and FA408/FA409. These flanking  
833 regions (415 and 418 nt-long, respectively) allow chromosomal homologous  
834 recombination to occur. The internal primers (FA407 and FA408) were used to  
835 introduce a 3'- and 5'- *rpsL<sub>CJ</sub>-erm* cassette homology tail, respectively, to allow  
836 subsequent PCR assembly. The *rpsL<sub>CJ</sub>-erm* cassette was amplified from the pSP60-2

837 plasmid (Table 2) using the primer pair FA110/FA111. Then, the up- and downstream  
838 fragments were assembled with the *rpsL<sub>CJ</sub>-erm* cassette by PCR assembly using the  
839 external primers (FA406/FA409) (see Figure 1—figure supplement 1 and primer list in  
840 Table 4). This construct (1294 nt-long) was used to perform natural *H. pylori*  
841 transformation by homologous recombination, as previously described (Bury-Moné,  
842 Skouloubris, Labigne, & De Reuse, 2001). This process generated the strain that will  
843 serve as recipient in all our successive transformation experiments,  
844  $\Delta aapA3/IsoA3::rpsL_{CJ}\text{-erm}/K43R$  (Table 1).

845

#### 846 ***aapA3/IsoA3* locus sub-cloning in *E. coli***

847 Because *H. pylori* has a highly active homologous recombination machinery, a cloning  
848 step of the *aapA3/IsoA3* locus in an *E. coli* vector was essential to avoid contamination  
849 with WT *H. pylori* gDNA of the PCR products used in the transformation assays. To  
850 this end, the *aapA3/IsoA3* locus was split into two fragments amplified with the Phusion  
851 High-Fidelity Hot Start DNA Polymerase and the primer pairs FA406/FA386 (“Up”  
852 fragment of 638 nt containing 415 nt of homology region, the *aapA3* promoter and the  
853 first 10 codons of the AapA3 ORF, Figure 1 - figure supplement 1) and FA409/FA387  
854 (“Down” fragment of 680 nt containing IsoA3 promoter, the rest of *aapA3* mRNA and  
855 418 nt of homology region, Figure 1 - figure supplement 1). Note that the FA386 and  
856 FA387 primers have 25 nucleotides of overlap to allow PCR assembly. Each fragment  
857 was cloned in a separate pGEM®-T (Promega) plasmid (Table 2) and transformed into  
858 One-Shot TOP10 chemically competent *E. coli* cells (see Experimental Models in the  
859 KEY RESOURCES TABLE).

860

#### 861 **Mutant generation by Site-Directed mutagenesis PCR**

862 Plasmids and custom-designed overlapping oligonucleotides containing the desired  
863 mutations were used for site-directed mutagenesis PCR using the PfuUltra high-fidelity  
864 DNA polymerase. To inactivate the IsoA3 -10 box, two synonymous point mutations  
865 (adenines +87 and +90 from the toxin TSS were mutated to cytosine and guanine,  
866 respectively) were introduced using the primer pair FA283/FA284 see Figure 1 for  
867 details). This strategy allowed us to preserve the toxin coding sequence while  
868 completely abolishing the transcription of the antitoxin, as previously shown (Arnion et

869 al., 2017). To inactivate the toxin start codon, a single point mutation in the third codon  
870 position was introduced (thymine 54 was mutated to guanine) using the primer pair  
871 FA281/FA282 (see Figure 1 for details). WT or mutated fragments were amplified from  
872 the previously generated plasmids using the same primer pairs as those used for insert  
873 amplification prior to cloning. PCR assembly with 35 amplification cycles, the Phusion  
874 High-Fidelity Hot Start DNA Polymerase and the external primers FA406/FA409 was  
875 performed to generate the *aapA3/IsoA3* locus variants (1294-nt amplicon) that were  
876 subsequently used as DNA substrates for *H. pylori* natural transformation. For the *in*  
877 *vivo* validation of the suppressor mutants studied here, the same protocol was used  
878 adapting the DNA oligonucleotides containing the desired mutations.

879

### 880 **Determining *H. pylori* transformation efficiency**

881 For the transformation assays aiming at the determination of the transformation  
882 efficiency as an indirect proof of the toxicity of the expression of a PCR construct,  
883 transformation patches (after 16 hours growth upon DNA addition) were recovered and  
884 resuspended in 1 mL BHI. Ten-fold serial dilutions adapted to each transformation  
885 case ( $10^7$ ,  $10^6$  and  $10^5$  for non-selective media; and  $10^4$ ,  $10^3$ ,  $10^2$  for selective media  
886 upon transformation with water or a toxic construct; and  $10^5$ ,  $10^4$ ,  $10^3$  for selective  
887 media upon transformation with non-toxic constructs) were performed. Allelic  
888 replacement events were selected by the use of streptomycin-containing plates  
889 (selection of loss of the *rpsL<sub>CJ</sub>-erm* cassette, Str<sup>R</sup>). The number of Str<sup>R</sup> CFU/ total CFU  
890 was calculated, plotted and statistically analyzed by unpaired *t* (student)-test  
891 (GraphPad Prism software version 7).

892

### 893 ***H. pylori* transformation assay to identify toxicity suppressors by Illumina 894 sequencing**

895 Transformation assays to select toxicity suppressors were performed in three  
896 biological replicates using the wild-type (WT) or antitoxin promoter inactivated PCR-  
897 generated constructs (pIsoA3\*). Upon transformation, all bacteria were recovered and  
898 serially diluted. Transformants were selected on streptomycin-containing plates by  
899 using optimized dilutions (9 plates/replicate of  $10^1$  dilution for pIsoA3\* and 3  
900 plates/replicate of  $10^3$  dilution for WT). Three days after transformation, colonies were  
901 pooled (approximately 60,000 colonies per transformation) and genomic DNA was

902 extracted. Next, the *aapA3/lsoA3* locus was amplified with the primer pair  
903 FA395/FA396 (426-nt amplicon, Figure 1 - figure supplement 1), which allows the  
904 introduction of the DNA adapters for Illumina paired-end sequencing. Importantly, to  
905 avoid amplification from phenotypic revertant clones (mutated in the *rpsL* gene), the  
906 FA395 and FA396 primers are nested to the ones used for locus deletion (FA407 and  
907 FA408, Figure 1 - figure supplement 1), thus, binding to deleted regions that are re-  
908 introduced only upon recombination. For this PCR, the Phusion High-Fidelity Hot Start  
909 DNA polymerase (Thermo Fisher) and 35 amplification cycles were used. Finally, the  
910 samples were sent for sequencing at the Plateforme GeT-PlaGe-, Genotoul Centre  
911 INRA, Toulouse, France. Sequencing was done on an Illumina MiSeq instrument in  
912 paired-end mode 2 x 250 nt (overlapping reads).

913

#### 914 **Polysome fractionation in sucrose gradients**

915 *H. pylori* strains were grown as described above. At an early exponential phase  
916 ( $OD_{600nm} < 0.9$ ), chloramphenicol (100  $\mu\text{g}\cdot\text{mL}^{-1}$ ) was added to the culture to stabilize  
917 translating ribosomes. After 5 min incubation at 37°C, cultures were quickly cooled by  
918 transferring them into pre-chilled flasks immersed in a dry ice/ethanol bath. Cultures  
919 were then centrifuged for 10 min at 3,500 rpm and 4°C and pellets were washed with  
920 Buffer A (10 mM Tris-HCl pH 7.5; 60 mM KCl; 10 mM  $\text{MgCl}_2$ ) and frozen at -80°C.  
921 Then, pellets were resuspended in 500  $\mu\text{l}$  of Buffer A containing RNasin®  
922 Ribonuclease Inhibitor (Promega) and cells were lysed with glass beads in a Precellys  
923 homogenizer (Bertin). Lysates were recovered and immediately frozen in liquid  
924 nitrogen. About 10  $OD_{260}$  units of lysate were layered onto 10%-40% sucrose gradients  
925 in Grad-Buffer (10 mM Tris-HCl pH 7.5; 50 mM  $\text{NH}_4\text{Cl}$ ; 10 mM  $\text{MgCl}_2$ ; 1mM DTT) and  
926 centrifuged at 35,000 rpm for 3.75 h at 4°C in a SW41 Ti rotor. Gradients were  
927 analysed with an ISCO UA-6 detector with continuous OD monitoring at 254 nm.  
928 Fractions of 500  $\mu\text{l}$  were collected and RNA was precipitated overnight at -20°C in the  
929 presence of 1 volume of ethanol containing 150 mM of sodium acetate (pH 5.2). RNA  
930 was extracted and subjected to Northern Blot analysis following the protocols  
931 described above.

932



## 933 **BIOINFORMATIC AND STATISTICAL NGS DATA ANALYSES**

### 934 **Read pre-processing and alignment**

935 Reads were first trimmed of low-quality 3' ends using cutadapt 1.1  
936 (<https://cutadapt.readthedocs.org/>) and a base quality threshold of 28 (option “-q 28”).  
937 Then, reads having an average base quality lower than 28 were discarded using  
938 prinseq-lite 0.20.4 (“-min\_qual\_mean 28”; (Schmieder & Edwards, 2011)). Read pairs  
939 for which both mates passed the quality filtering steps were recovered by means of  
940 cmpfastq (<http://compbio.brc.iop.kcl.ac.uk/software/cmpfastq.php>), and mates were  
941 assembled into a single sequence using PANDAseq 2.9 (Masella, Bartram,  
942 Truszkowski, Brown, & Neufeld, 2012) run with options “-N -o 30 -O 0 -t 0.6 -A  
943 simple\_bayesian -C empty”. About 5 million read pairs (combining the three biological  
944 replicates) could be assembled for the WT (*aapA3/plsoA3*) and *plsoA3\**  
945 (*aapA3/plsoA3\**) samples. These assembled reads were aligned onto the 426-nt  
946 reference sequence by the BWA-SW algorithm of BWA 0.7.12 (Li & Durbin, 2009) run  
947 with options “-a 1 -b 3 -q 5 -r 2 -z 1” to produce alignments in BAM format. Mapped  
948 sequences of length 426 showing a single substitution compared to the reference were  
949 then extracted using utilities from the samtools 1.2 (Li et al., 2009) and bamtools 2.3.0  
950 (Barnett, Garrison, Quinlan, Stromberg, & Marth, 2011) packages based on the various  
951 flags and tags in the BAM files (in particular the CIGAR string and NM tag). This gave  
952 a dataset of 1,653,406 WT and 2,559,164 *plsoA3\** single-substitution sequences.  
953 Mapped sequences of length 425 and 427 harboring a single deletion or insertion,  
954 respectively, were also extracted (40,998 WT and 100,754 *plsoA3\** single-deletion  
955 sequences; 4,799 WT and 7,048 *plsoA3\** single-insertion sequences).

956

### 957 **Statistical analysis**

958 Statistical analyses of the differential distribution of substitutions in the WT and *plsoA3\**  
959 single-substitution sequences were carried out. To determine whether substitutions  
960 were enriched at particular positions in the *plsoA3\** compared to WT sequences, a  
961 “positional” analysis was conducted by summing together the counts of all sequences  
962 that showed a substitution at a given position, regardless of the identity of the  
963 substituted nucleotide. A “nucleotide-specific” analysis comparing the amount of each  
964 individual sequence was also done to determine whether particular nucleotides were  
965 enriched at specific positions. As positions +87 and +90 were mutated to inactivate the

966 IsoA3 promoter (see Figure 1B), for the “nucleotide-specific” analysis all sequences  
967 showing a difference to the reference at one or both of these two positions were  
968 excluded from the plsoA3\* and WT datasets (11,319 plsoA3\* and 38,575 WT  
969 sequences, respectively), and the plsoA3\* reference was converted back to the WT  
970 reference in order to make data comparable between WT and plsoA3\* samples.  
971 Differential analyses were conducted following the protocol of Haas *et al.* (Haas et al.,  
972 2013) using tools from the Trinity 2.2.0 (Haas et al., 2013) and DESeq2 1.10.1  
973 packages (Love, Huber, & Anders, 2014), taking into account variability among the  
974 three biological replicates. The sequence abundance estimation step was not  
975 performed; actual sequence counts were used. The four positions at each extremity of  
976 the 426-nt amplicon corresponding to pieces of the primers could not be included in  
977 the statistical analyses as there were no substitutions at these positions in any the WT  
978 and plsoA3\* replicates. Substitutions were considered as significantly over- or under-  
979 represented in the plsoA3\* vs. WT samples if the *p*-value adjusted for multiple testing  
980 (False Discovery Rate [FDR] calculated using the Benjamini-Hochberg [BH] method in  
981 DESeq2) was equal or lower than 5% ( $p_{adj} \leq 0.05$ ). Bar plots of normalized sequence  
982 counts and log<sub>2</sub> ratios of fold change were drawn using R 3.2.0 (R Core Team, 2015.  
983 R: A language and environment for statistical computing. R Foundation for Statistical  
984 Computing, Vienna, Austria; <http://www.R-project.org/>). Similar “positional” analyses  
985 were also carried out for single-insertion and single-deletion sequences to determine  
986 whether insertions or deletions were statistically enriched at particular positions in the  
987 plsoA3\* dataset.

988 For the “positional” analysis, a heatmap and hierarchical tree clustering of  
989 samples according to sequence count patterns was also performed. This was based  
990 on TMM-normalized (trimmed mean of M values), median-centered, log<sub>2</sub>-transformed  
991 FPKM (fragment per kilobase per million reads mapped) values, computed according  
992 to the protocol and tools of Haas *et al.* (Haas et al., 2013). The Pearson correlation  
993 coefficient was used as distance metric and average linkage was chosen as clustering  
994 method (options “--sample\_dist sample\_cor --sample\_cor pearson --sample\_clust  
995 average” for the “analyze\_diff\_expr.pl” utility script). A log<sub>2</sub> cut-off of 0 and a *p*-value  
996 cut-off of 1 were set (options “-C 0 -P 1”) in order to include all sequence positions in  
997 the map. The clustering script “PtR” was manually edited to suppress the clustering by  
998 sequence (*i.e.*, rows) and sort the positions by numerical order instead.

999

## 1000 DATA AVAILABILITY

1001 The deep-sequencing raw and analyzed datasets reported in this paper have been  
1002 deposited in the National Center for Biotechnology Information Gene Expression  
1003 Omnibus (NCBI GEO) data repository under the accession code GSE121423 and  
1004 can be accessible at the URL:

1005 <https://www.ncbi.nlm.nih.gov/geo/query/acc.cgi?acc=GSE121423>

1006

## 1007 ACKNOWLEDGMENTS

1008 We thank all present and past members of the ARNA laboratory for helpful discussions  
1009 and in particular, Anais Le Rhun for critical reading of the manuscript. This work was  
1010 supported by INSERM U1212, CNRS UMR 5320, Université de Bordeaux, and Agence  
1011 Nationale de la Recherche (<http://www.agence-nationale-recherche.fr/>) grants  
1012 Bactox1 and asSUPYCO. This work was performed in collaboration with the GeT core  
1013 facility, Toulouse, France (<http://get.genotoul.fr>), and was then supported by France  
1014 Génomique National infrastructure, funded as part of “Investissement d’avenir”  
1015 program managed by Agence Nationale pour la Recherche (contract ANR-10-INBS-  
1016 09). This project has also received funding from the European Union’s Horizon 2020  
1017 research and innovation programme under the Marie Skłodowska-Curie grant  
1018 agreement No 642738. The funders had no role in study design, data collection and  
1019 analysis, decision to publish, or preparation of the manuscript.

1020

1021

## 1022 REFERENCES

- 1023 Arnion, H., Korkut, D. N., Masachis Gelo, S., Chabas, S., Reignier, J., Iost, I., &  
1024 Darfeuille, F. (2017). Mechanistic insights into type I toxin antitoxin systems in  
1025 *Helicobacter pylori*: the importance of mRNA folding in controlling toxin  
1026 expression. *Nucleic Acids Research*, gkw1343.  
1027 <http://doi.org/10.1093/nar/gkw1343>
- 1028 Atherton, J. C., Sharp, P. M., & Lafay, B. (2000). Absence of translationally selected  
1029 synonymous codon usage bias in *Helicobacter pylori*. *Microbiology*, 146(4), 851–  
1030 860. <http://doi.org/10.1099/00221287-146-4-851>

- 1031 Barnett, D. W., Garrison, E. K., Quinlan, A. R., Stromberg, M. P., & Marth, G. T.  
1032 (2011). BamTools: a C++ API and toolkit for analyzing and managing BAM files.  
1033 *Bioinformatics*, 27(12), 1691–1692. <http://doi.org/10.1093/bioinformatics/btr174>
- 1034 Beaudry, A. A., & Joyce, G. F. (1992). Directed evolution of an RNA enzyme.  
1035 *Science (New York, N.Y.)*, 257(5070), 635–41.
- 1036 Bentele, K., Saffert, P., Rauscher, R., Ignatova, Z., & Bluthgen, N. (2014). Efficient  
1037 translation initiation dictates codon usage at gene start. *Molecular Systems*  
1038 *Biology*, 9(1), 675–675. <http://doi.org/10.1038/msb.2013.32>
- 1039 Bhattacharyya, S., Jacobs, W. M., Adkar, B. V., Yan, J., Zhang, W., & Shakhnovich,  
1040 E. I. (2018). Accessibility of the Shine-Dalgarno Sequence Dictates N-Terminal  
1041 Codon Bias in *E. coli*. *Molecular Cell*, 70(5), 894–905.e5.  
1042 <http://doi.org/10.1016/j.molcel.2018.05.008>
- 1043 Brantl, S., & Jahn, N. (2015). SRNAs in bacterial type I and type III toxin-antitoxin  
1044 systems. *FEMS Microbiology Reviews*, 39(3), 413–427.  
1045 <http://doi.org/10.1093/femsre/fuv003>
- 1046 Bury-Moné, S., Skouloubris, S., Labigne, A., & De Reuse, H. (2001). The  
1047 *Helicobacter pylori* Urel protein: role in adaptation to acidity and identification of  
1048 residues essential for its activity and for acid activation. *Molecular Microbiology*,  
1049 42(4), 1021–34.
- 1050 Carter-Muenchau, P., & Wolf, R. E. (1989). Growth-rate-dependent regulation of 6-  
1051 phosphogluconate dehydrogenase level mediated by an anti-Shine-Dalgarno  
1052 sequence located within the *Escherichia coli* *gnd* structural gene. *Proceedings of*  
1053 *the National Academy of Sciences of the United States of America*, 86(4), 1138–  
1054 42.
- 1055 Dailidienė, D., Dailidienė, G., Kersulyte, D., & Berg, D. E. (2006). Contraselectable  
1056 Streptomycin Susceptibility Determinant for Genetic Manipulation and Analysis  
1057 of *Helicobacter pylori*, 72(9), 5908–5914. <http://doi.org/10.1128/AEM.01135-06>
- 1058 Darfeuille, F., Unoson, C., Vogel, J., & Wagner, E. G. H. (2007). An Antisense RNA  
1059 Inhibits Translation by Competing with Standby Ribosomes. *Molecular Cell*,  
1060 26(3), 381–392. <http://doi.org/10.1016/j.molcel.2007.04.003>
- 1061 Darty, K., Denise, A., & Ponty, Y. (2009). VARNA: Interactive drawing and editing of  
1062 the RNA secondary structure. *Bioinformatics*, 25(15), 1974–1975.  
1063 <http://doi.org/10.1093/bioinformatics/btp250>
- 1064 De Smit, M. H., & Duin, J. Van. (1990). Control of Prokaryotic Translational Initiation

- 1065 by mRNA Secondary Structure. *Progress in Nucleic Acid Research and*  
1066 *Molecular Biology*, 38(C), 1–35. [http://doi.org/10.1016/S0079-6603\(08\)60707-2](http://doi.org/10.1016/S0079-6603(08)60707-2)
- 1067 Durand, S., Jahn, N., Condon, C., & Brantl, S. (2012). Type I toxin-antitoxin systems  
1068 in *Bacillus subtilis*. *RNA Biology*, 9(12), 1491–7. <http://doi.org/10.4161/rna.22358>
- 1069 Duval, M., Korepanov, A., Fuchsbaauer, O., Fechter, P., Haller, A., Fabbretti, A., ...  
1070 Marzi, S. (2013). *Escherichia coli* Ribosomal Protein S1 Unfolds Structured  
1071 mRNAs Onto the Ribosome for Active Translation Initiation. *PLoS Biology*,  
1072 11(12), 12–14. <http://doi.org/10.1371/journal.pbio.1001731>
- 1073 Duval, M., Simonetti, A., Caldelari, I., & Marzi, S. (2015). Multiple ways to regulate  
1074 translation initiation in bacteria: Mechanisms, regulatory circuits, dynamics.  
1075 *Biochimie*, 114, 18–29. <http://doi.org/10.1016/j.biochi.2015.03.007>
- 1076 Groeneveld, H., Thimon, K., & van Duin, J. (1995). Translational control of  
1077 maturation-protein synthesis in phage MS2: a role for the kinetics of RNA  
1078 folding? *RNA*, 1(1), 79–88.
- 1079 Gruber, A. R., Lorenz, R., Bernhart, S. H., Neuböck, R., & Hofacker, I. L. (2008). The  
1080 Vienna RNA websuite. *Nucleic Acids Research*, 36(Web Server issue), W70-4.  
1081 <http://doi.org/10.1093/nar/gkn188>
- 1082 Gulyaev, A. P., Franch, T., & Gerdes, K. (1997). Programmed Cell Death by hok /  
1083 sok of Plasmid R1 : Coupled Nucleotide Covariations Reveal a Phylogenetically  
1084 Conserved Folding Pathway in the hok Family of mRNAs, 26–37.
- 1085 Haas, B. J., Papanicolaou, A., Yassour, M., Grabherr, M., Blood, P. D., Bowden, J.,  
1086 ... Regev, A. (2013). De novo transcript sequence reconstruction from RNA-seq  
1087 using the Trinity platform for reference generation and analysis. *Nature*  
1088 *Protocols*, 8(8), 1494–1512. <http://doi.org/10.1038/nprot.2013.084>
- 1089 Han, K., Kim, K. S., Bak, G., Park, H., & Lee, Y. (2010). Recognition and  
1090 discrimination of target mRNAs by Sib RNAs, a cis-encoded sRNA family.  
1091 *Nucleic Acids Research*, 38(17), 5851–5866. <http://doi.org/10.1093/nar/gkq292>
- 1092 Harms, A., Brodersen, D. E., Mitarai, N., & Gerdes, K. (2018). Toxins, Targets, and  
1093 Triggers: An Overview of Toxin-Antitoxin Biology. *Molecular Cell*.  
1094 <http://doi.org/10.1016/j.molcel.2018.01.003>
- 1095 Incarnato, D., Morandi, E., Anselmi, F., Simon, L. M., Basile, G., & Oliviero, S.  
1096 (2017). In vivo probing of nascent RNA structures reveals principles of  
1097 cotranscriptional folding. *Nucleic Acids Research*, 45(16), 9716–9725.  
1098 <http://doi.org/10.1093/nar/gkx617>

- 1099 Jahn, N., Preis, H., Wiedemann, C., & Brantl, S. (2012). BsrG/SR4 from *Bacillus*  
1100 subtilis- the first temperature-dependent type I toxin-antitoxin system. *Molecular*  
1101 *Microbiology*, 83(3), 579–598. <http://doi.org/10.1111/j.1365-2958.2011.07952.x>
- 1102 Kriner, M. A., Sevostyanova, A., & Groisman, E. A. (2016). Learning from the  
1103 Leaders: Gene Regulation by the Transcription Termination Factor Rho. *Trends*  
1104 *in Biochemical Sciences*, 41(8), 690–699.  
1105 <http://doi.org/10.1016/j.tibs.2016.05.012>
- 1106 Kudla, G., Murray, A. W., Tollervey, D., & Plotkin, J. B. (2009). Coding-sequence  
1107 determinants of gene expression in *Escherichia coli*. *Science (New York, N.Y.)*,  
1108 324(5924), 255–8. <http://doi.org/10.1126/science.1170160>
- 1109 Lai, D., Proctor, J. R., & Meyer, I. M. (2013). On the importance of cotranscriptional  
1110 RNA structure formation. *RNA*, 19(11), 1461–1473.  
1111 <http://doi.org/10.1261/rna.037390.112>
- 1112 Li, H., & Durbin, R. (2009). Fast and accurate short read alignment with Burrows-  
1113 Wheeler transform. *Bioinformatics*, 25(14), 1754–1760.  
1114 <http://doi.org/10.1093/bioinformatics/btp324>
- 1115 Li, H., Handsaker, B., Wysoker, A., Fennell, T., Ruan, J., Homer, N., ... 1000  
1116 Genome Project Data Processing Subgroup. (2009). The Sequence  
1117 Alignment/Map format and SAMtools. *Bioinformatics*, 25(16), 2078–2079.  
1118 <http://doi.org/10.1093/bioinformatics/btp352>
- 1119 Linnstaedt, S., Kasprzak, W., Shapiro, B., & Casey, J. (2006). The role of a  
1120 metastable RNA secondary structure in hepatitis delta virus genotype III RNA  
1121 editing. *RNA*, 12, 1521–1533. <http://doi.org/10.1261/rna.89306.HDV>
- 1122 Love, M. I., Huber, W., & Anders, S. (2014). Moderated estimation of fold change and  
1123 dispersion for RNA-seq data with DESeq2. *Genome Biology*, 15(12), 550.  
1124 <http://doi.org/10.1186/s13059-014-0550-8>
- 1125 Masachis, S., & Darfeuille, F. (2018). Type I Toxin-Antitoxin Systems: Regulating  
1126 Toxin Expression via Shine-Dalgarno Sequence Sequestration and Small RNA  
1127 Binding. *Microbiology Spectrum*, 6(4).  
1128 <http://doi.org/10.1128/microbiolspec.RWR-0030-2018>
- 1129 Masachis, S., Tourasse, N. J., Chabas, S., Bouchez, O., & Darfeuille, F. (2018).  
1130 FASTBAC-Seq: Functional Analysis of Toxin–Antitoxin Systems in Bacteria by  
1131 Deep Sequencing. In *Methods in enzymology* (Vol. 612, pp. 67–100).  
1132 <http://doi.org/10.1016/bs.mie.2018.08.033>

- 1133 Masella, A. P., Bartram, A. K., Truszkowski, J. M., Brown, D. G., & Neufeld, J. D.  
1134 (2012). PANDaseq: paired-end assembler for illumina sequences. *BMC*  
1135 *Bioinformatics*, *13*(1), 31. <http://doi.org/10.1186/1471-2105-13-31>
- 1136 Mearls, E. B., Jackter, J., Colquhoun, J. M., Farmer, V., Matthews, A. J., Murphy, L.  
1137 S., ... Camp, A. H. (2018). Transcription and translation of the sigG gene is  
1138 tuned for proper execution of the switch from early to late gene expression in the  
1139 developing *Bacillus subtilis* spore. *PLOS Genetics*, *14*(4), e1007350.  
1140 <http://doi.org/10.1371/journal.pgen.1007350>
- 1141 Meyer, I. M. (2017). In silico methods for co-transcriptional RNA secondary structure  
1142 prediction and for investigating alternative RNA structure expression. *Methods*,  
1143 *120*, 3–16. <http://doi.org/10.1016/j.ymeth.2017.04.009>
- 1144 Meyer, M. M. (2017). The role of mRNA structure in bacterial translational regulation.  
1145 *Wiley Interdisciplinary Reviews. RNA*, *8*(1). <http://doi.org/10.1002/wrna.1370>
- 1146 Møller-Jensen, J., Franch, T., & Gerdes, K. (2001). Temporal Translational Control  
1147 by a Metastable RNA Structure. *Journal of Biological Chemistry*, *276*(38),  
1148 35707–35713. <http://doi.org/10.1074/jbc.M105347200>
- 1149 Mustoe, A. M., Busan, S., Rice, G. M., Hajdin, C. E., Peterson, B. K., Ruda, V. M., ...  
1150 Weeks, K. M. (2018). Pervasive Regulatory Functions of mRNA Structure  
1151 Revealed by High-Resolution SHAPE Probing. *Cell*, *173*(1), 181–195.e18.  
1152 <http://doi.org/10.1016/j.cell.2018.02.034>
- 1153 Nagel, J. H., Gulyaev, A. P., Gerdes, K., & Pleij, C. W. (1999). Metastable structures  
1154 and refolding kinetics in hok mRNA of plasmid R1. *RNA (New York, N. Y.)*, *5*(11),  
1155 1408–18.
- 1156 Pan, J., & Woodson, S. A. (1998). Folding intermediates of a self-splicing RNA:  
1157 mispairing of the catalytic core. *Journal of Molecular Biology*, *280*(4), 597–609.  
1158 <http://doi.org/10.1006/jmbi.1998.1901>
- 1159 Pedersen, K., & Gerdes, K. (1999). Multiple hok genes on the chromosome of  
1160 *Escherichia coli*. *Molecular Microbiology*, *32*(5), 1090–102.
- 1161 Repsilber, D., Wiese, S., Rachen, M., Schröder, A. W., Riesner, D., & Steger, G.  
1162 (1999). Formation of metastable RNA structures by sequential folding during  
1163 transcription : Time-resolved structural analysis of potato spindle tuber viroid (–) -  
1164 stranded RNA by temperature-gradient gel electrophoresis, 574–584.
- 1165 Rinaldi, A. J., Lund, P. E., Blanco, M. R., & Walter, N. G. (2016). The Shine-Dalgarno  
1166 sequence of riboswitch-regulated single mRNAs shows ligand-dependent

- 1167 accessibility bursts. *Nature Communications*, 7, 8976.  
1168 <http://doi.org/10.1038/ncomms9976>
- 1169 Schmieder, R., & Edwards, R. (2011). Quality control and preprocessing of  
1170 metagenomic datasets. *Bioinformatics*, 27(6), 863–864.  
1171 <http://doi.org/10.1093/bioinformatics/btr026>
- 1172 Sharma, C. M., Darfeuille, F., Plantinga, T. H., & Vogel, J. (2007). A small RNA  
1173 regulates multiple ABC transporter mRNAs by targeting C/A-rich elements inside  
1174 and upstream of ribosome-binding sites. *Genes and Development*, 21(21),  
1175 2804–2817. <http://doi.org/10.1101/gad.447207>
- 1176 Sharma, C. M., Hoffmann, S., Darfeuille, F., Reignier, J., Findeiss, S., Sittka, A., ...  
1177 Vogel, J. (2010). The primary transcriptome of the major human pathogen  
1178 *Helicobacter pylori*. *Nature*, 464(7286), 250–255.  
1179 <http://doi.org/10.1038/nature08756>
- 1180 Sharma, I. M., Rappé, M. C., Addepalli, B., Grabow, W. W., Zhuang, Z.,  
1181 Abeysirigunawardena, S. C., ... Woodson, S. A. (2018). A metastable rRNA  
1182 junction essential for bacterial 30S biogenesis. *Nucleic Acids Research*, 46(10),  
1183 5182–5194. <http://doi.org/10.1093/nar/gky120>
- 1184 Silvaggi, J. M., Perkins, J. B., & Losick, R. (2005). Small Untranslated RNA Antitoxin  
1185 in *Bacillus subtilis*. *Journal of Bacteriology*, 187(19), 6641–6650.  
1186 <http://doi.org/10.1128/JB.187.19.6641-6650.2005>
- 1187 Tomb, J. F., White, O., Kerlavage, A. R., Clayton, R. A., Sutton, G. G., Fleischmann,  
1188 R. D., ... Venter, J. C. (1997). The complete genome sequence of the gastric  
1189 pathogen *Helicobacter pylori*. *Nature*, 388(6642), 539–547.  
1190 <http://doi.org/10.1038/41483>
- 1191 Uhm, H., Kang, W., Ha, K. S., Kang, C., & Hohng, S. (2018). Single-molecule FRET  
1192 studies on the cotranscriptional folding of a thiamine pyrophosphate riboswitch.  
1193 *Proceedings of the National Academy of Sciences*, 115(2), 331–336.  
1194 <http://doi.org/10.1073/pnas.1712983115>
- 1195 van Meerten, D., Girard, G., & van Duin, J. (2001). Translational control by delayed  
1196 RNA folding: identification of the kinetic trap. *RNA (New York, N.Y.)*, 7(3), 483–  
1197 94.
- 1198 Watters, K. E., Strobel, E. J., Yu, A. M., Lis, J. T., & Lucks, J. B. (2016).  
1199 Cotranscriptional folding of a riboswitch at nucleotide resolution. *Nature*  
1200 *Structural & Molecular Biology*, 23(12), 1124–1131.



1201 <http://doi.org/10.1038/nsmb.3316>

1202 Wen, J., & Fozo, E. M. (2014). sRNA antitoxins: more than one way to repress a

1203 toxin. *Toxins*, 6(8), 2310–35. <http://doi.org/10.3390/toxins6082310>

1204 Zhu, J. Y. A., & Meyer, I. M. (2015). Four RNA families with functional transient

1205 structures. *RNA Biology*, 12(1), 5–20.

1206 <http://doi.org/10.1080/15476286.2015.1008373>

1207

1208

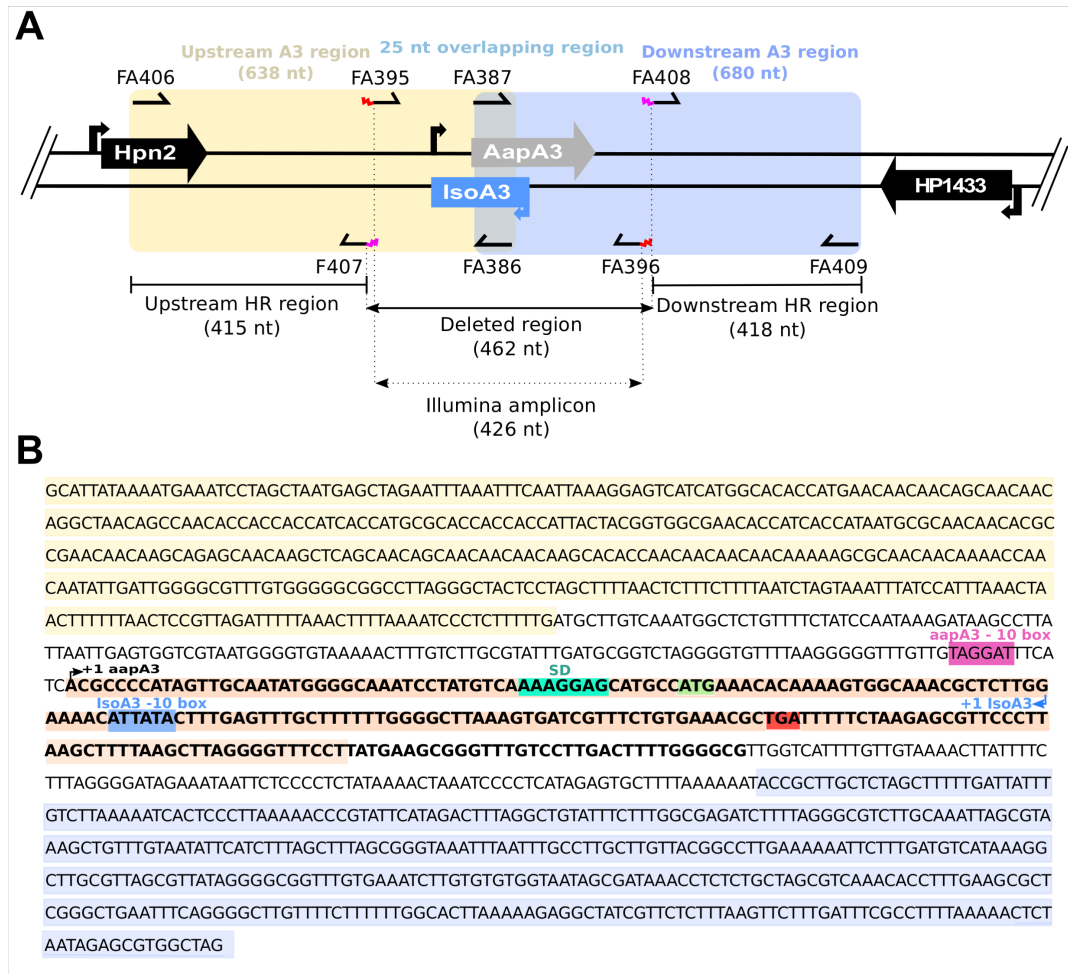

**Figure 1–figure supplement 1**

**Details on *aapA3*/IsoA3 locus deletion and deep-sequencing approaches. (A)** Schematic representation of the oligonucleotides used for the *aapA3*/IsoA3 locus deletion and Illumina paired-end sequencing. Are shown: the upstream and downstream homology regions (HR) used for homologous recombination in all transformation assays; the deleted region and the amplicon used for Illumina paired-end sequencing approach; primers FA407 and FA408 carrying an overhang 5' tail (in pink) containing the 5' and 3' ends, respectively, of the *rpsLc<sub>1</sub>-erm* cassette used for locus deletion; primers FA395 and FA396 carrying an overhang 5' tail (in red) containing the adapters for paired-end Illumina sequencing approach (see Table S4 for oligonucleotides sequences). **(B)** The *aapA3*/IsoA3 module located at the chromosomal locus III of the *H. pylori* 26695 strain. Upstream (415 nt) and downstream (418 nt) regions used for homologous recombination (HR) are highlighted in yellow and purple, respectively. Deleted region in the *aapA3*/IsoA3 knockout mutant corresponds to the region flanked by the upstream and downstream HR regions. AapA3 -10 box is shown in pink. AapA3 transcription start site (TSS, +1 *aapA3*) determined by RNA-seq analysis is represented with a black arrow. AapA3 full-length transcript is highlighted in bold. 3' end-truncated *aapA3* mRNA is highlighted in orange. AapA3 Shine-Dalgarno sequence (SD) is shown in turquoise. AapA3 start (ATG) and stop (TGA) codons are shown in green and red, respectively. IsoA3 -10 box is highlighted in blue. IsoA3 transcription start site (TSS, +1 IsoA3) is represented by a blue arrow.

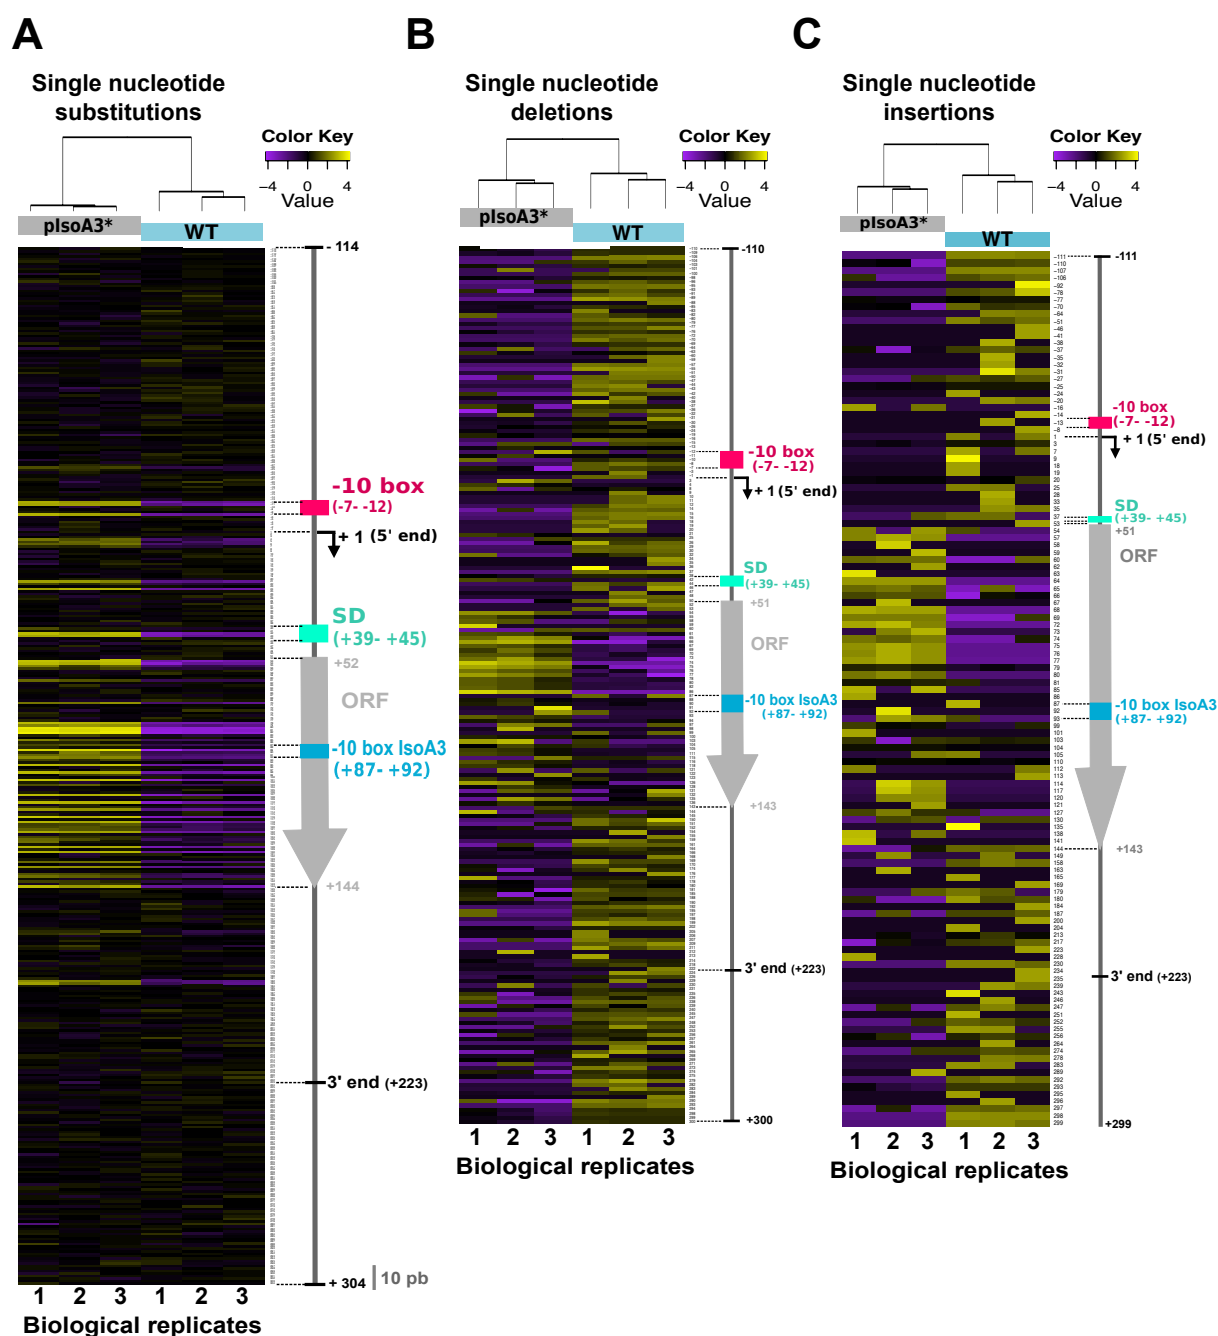

Figure 3–figure supplement 1

**Comparison of the distribution and relative frequency of single-nucleotide suppressors in the WT and pIsoA3\* *aapA3*/IsoA3 modules.** Heatmap of the location and relative abundance of single-nucleotide substitutions (A), deletions (B), and insertions (C), in WT (*aapA3*/IsoA3) and pIsoA3\* (*aapA3*/pIsoA3\*) samples coming from Miseq Illumina deep-sequencing. For a given position, all sequences showing a single-nucleotide substitution (A), deletion (B), or insertion (C) at that position were counted irrespective of the nucleotide identity (“positional” analysis). Sequence counts were converted into TMM-normalized, median-centered, and log<sub>2</sub>-transformed FPKM values, which were then hierarchically clustered according to biological replicate sample (see Methods section for details). The color key gives the log<sub>2</sub> value scale (negative and positive values represent relative

frequencies below and above the median, respectively). Positions are numbered relative to the *aapA3* transcriptional start site (TSS, +1). Colored arrows and boxes on the right-hand side of each heatmap indicate the locations of relevant sequence elements on the *aapA3*/IsoA3 locus: -10 box, *aapA3* promoter -10 box; -10 box IsoA3, IsoA3 promoter -10 box; +1 (5' end), *aapA3* transcription start site; SD, Shine-Dalgarno; ORF, open reading frame; 5' and 3' ends delimit the UTRs (untranslated regions) on the *aapA3* mRNA; the "10 nt" scale bar at the bottom of panel (A) is used to measure intervals of 10 nucleotides alongside the map.

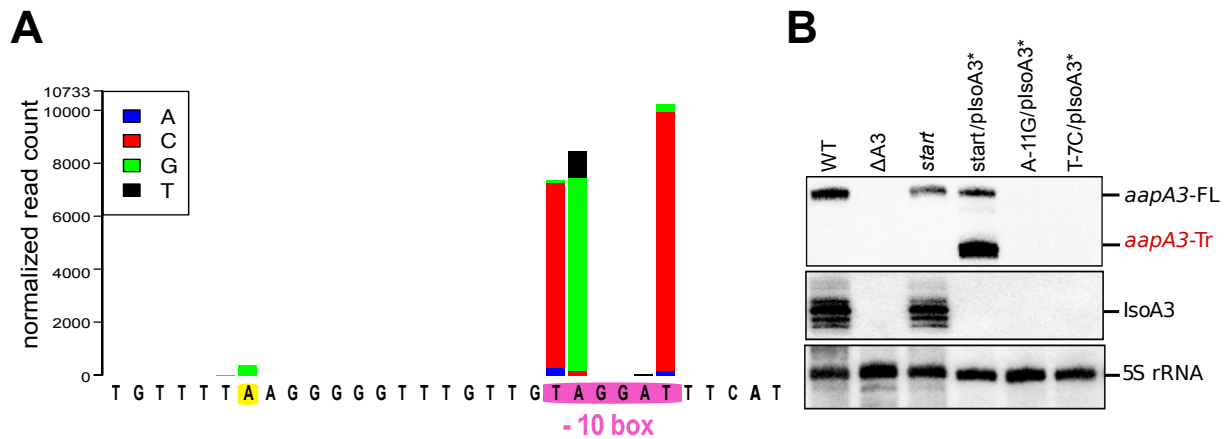

**Figure 3–figure supplement 2**

**Defining and validating AapA3 promoter with nucleotide resolution.** **A)** Statistical analysis of the differential amount of individual single-nucleotide substitution sequences in WT (*aapA3*/IsoA3) and pIsoA3\* (*aapA3*/pIsoA3\*) samples was carried out using DESeq2 (“nucleotide-specific” analysis; see Methods section for details). Nucleotide substitutions that are significantly enriched ( $\text{padj} \leq 0.05$ ) in pIsoA3\* compared to WT sequences in *aapA3* promoter region are shown. The -10 box of the *aapA3* gene promoter is highlighted in pink; an enriched mutation located at position -26 from *aapA3* +1 is highlighted in yellow. **(B)** Total RNA was isolated from the indicated strains and 10  $\mu\text{g}$  were subjected to Northern Blot analysis. The same membrane was successively probed with FD38 labeled oligonucleotide and IsoA3 riboprobe to detect *aapA3* and IsoA3 transcripts, respectively. The different transcripts are annotated as: *aapA3*-FL (full length), *aapA3*-Tr (3’ end truncated), and IsoA3 full-length and processed transcripts. Proper loading was assessed by the level of 5S rRNA using the labeled oligoprobe FD35.

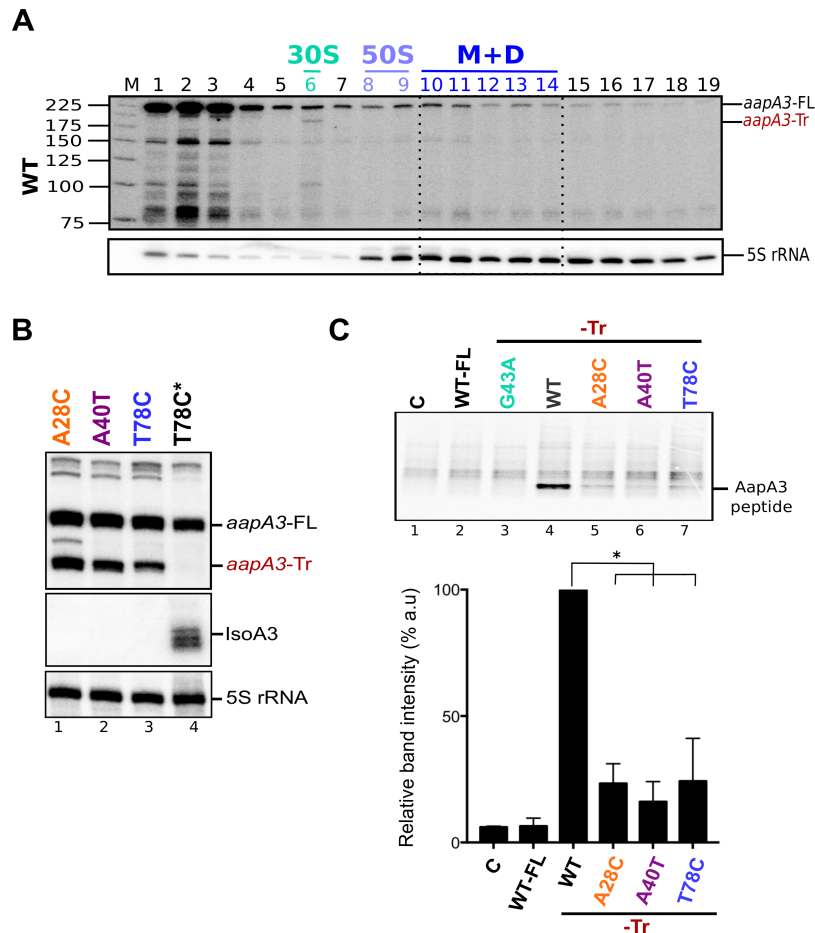

**Figure 4–figure supplement 1**

**The A28C, A40T and T78C suppressors inhibit *aapA3-Tr* mRNA translation.** (A) Only the 3' end truncated *aapA3* mRNA form is translated *in vivo*. Cell lysate of the *H. pylori* 26695 wild-type (WT) strain was subjected to ultracentrifugation through a sucrose gradient under polysome stabilization conditions (+ Chloramphenicol). A profile at OD<sub>254nm</sub> was recorded. RNA was extracted from each fraction and equal volumes of each extract were subjected to Northern Blot analysis. Fractions corresponding to the free 30S and 50S subunits, 70S ribosomes (free and translating) and polysomes are indicated. The different transcripts are annotated as: *aapA3-FL* (full length, 225 nt), *aapA3-Tr* (3' end truncated, 190 nt), and 5S rRNA as loading control (5S rRNA). M, monosomes; D, disomes. (B) Gene expression analysis of the indicated strains was analyzed by Northern Blot. Transcripts *aapA3-FL* (full length), *aapA3-Tr* (3' end truncated), and IsoA3 full-length and processed transcripts are shown. Proper loading was assessed by the level of 5S rRNA. The T78C\* construct contains a WT IsoA3. (C) Relative peptide production upon *in vitro* translation of *aapA3-FL*, *aapA3-Tr* and the *aapA3-Tr* form of the three independent suppressor mutants A28C-Tr, A40T-Tr and T78C-Tr (upper panel). A construct with inactivated SD sequence (G43A-Tr) was also included for comparison. Control lane (o) shows the translation background obtained without exogenous mRNA. A representative experiment is shown. Relative peptide production was quantified (lower panel). Error bars represent the s.d; *n*=3 technical replicates, \**P*<0.0001 according to unpaired t-test. Peptide production using the G43A-Tr control RNA was not quantified as the experiment was performed only once. Figure 4–figure supplement 1-source data 1

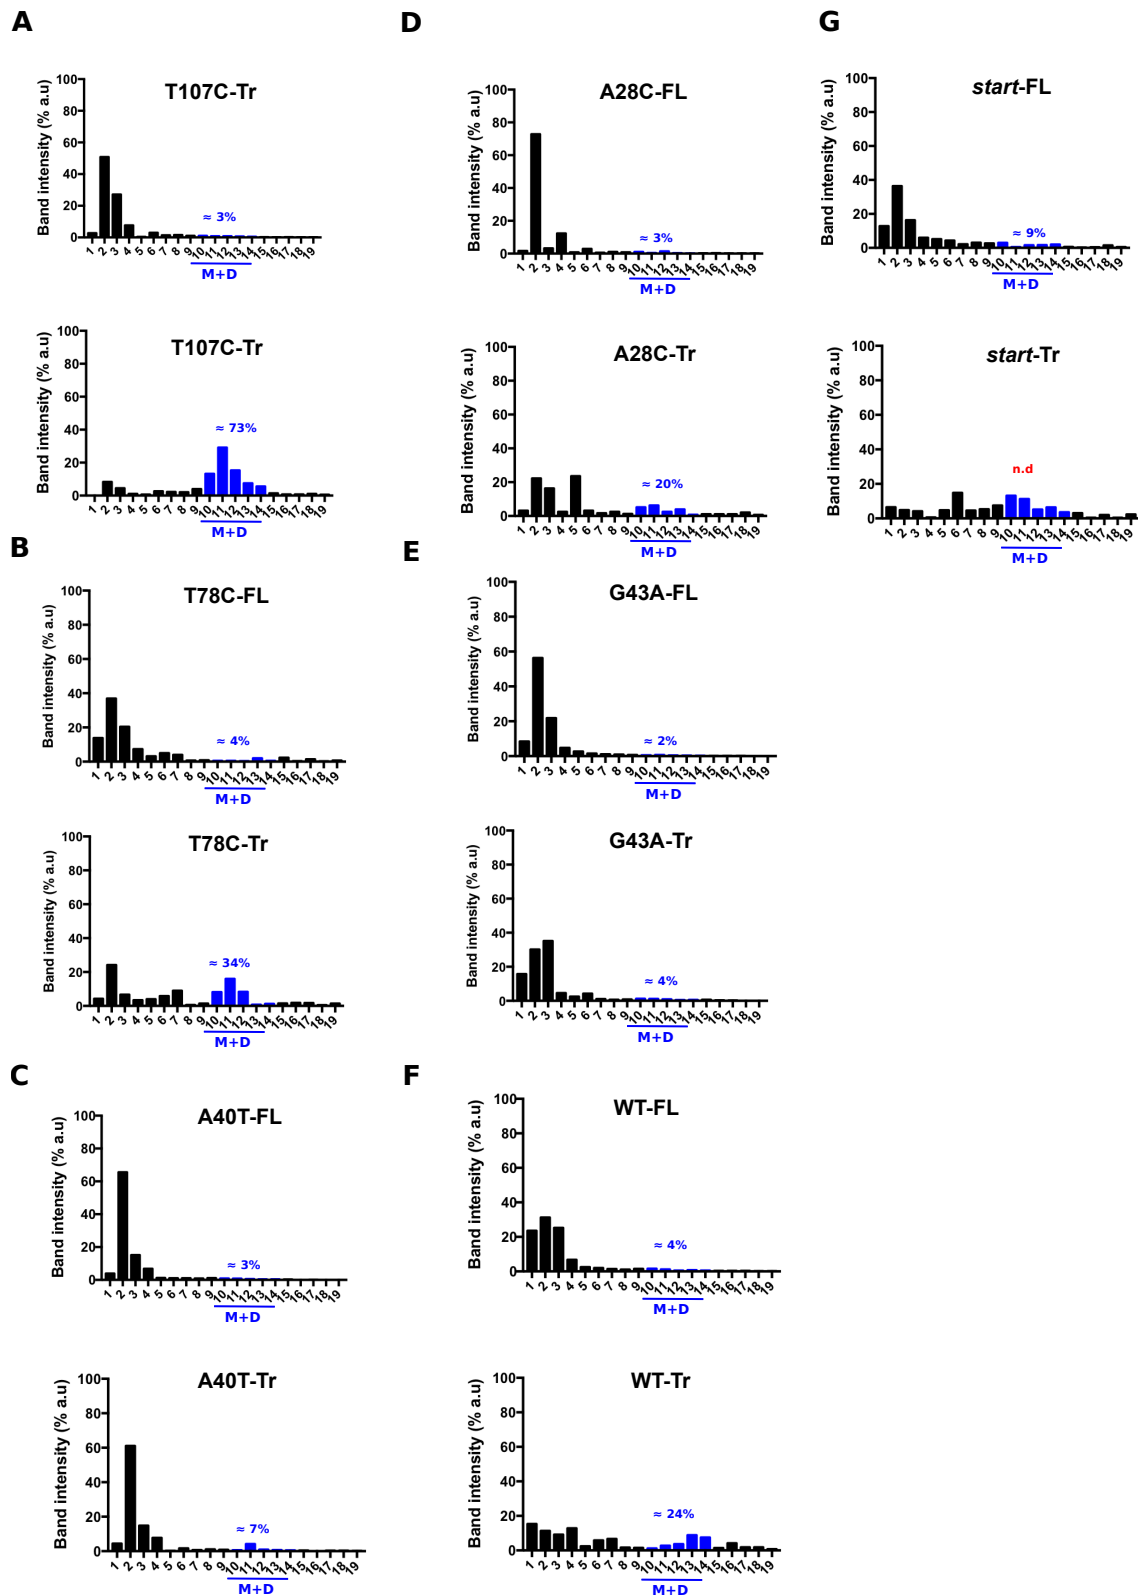

**Figure 4—figure supplement 2**

**Quantification of the relative *aapA3* mRNA band intensity from polysome fractionation Northern Blots shown in Figure 4.** Relative band intensity was determined using the ImageLab software. Percentage of band intensity located on 70S fractions was calculated for each *aapA3* transcript (full-length, -FL or truncated, -Tr) by dividing the band intensity in 70S fractions by the total band

intensity (intensity values in all fractions). Each panel shows the data for a given WT or mutant transcript. M, monosomes; D, disomes. In the case of the *start* (G54T/pIsoA3\*) strain, the quantification of the *aapA3*-Tr form present on the M+D fractions was not possible due to a strong mRNA degradation (n.d= non-detectable).



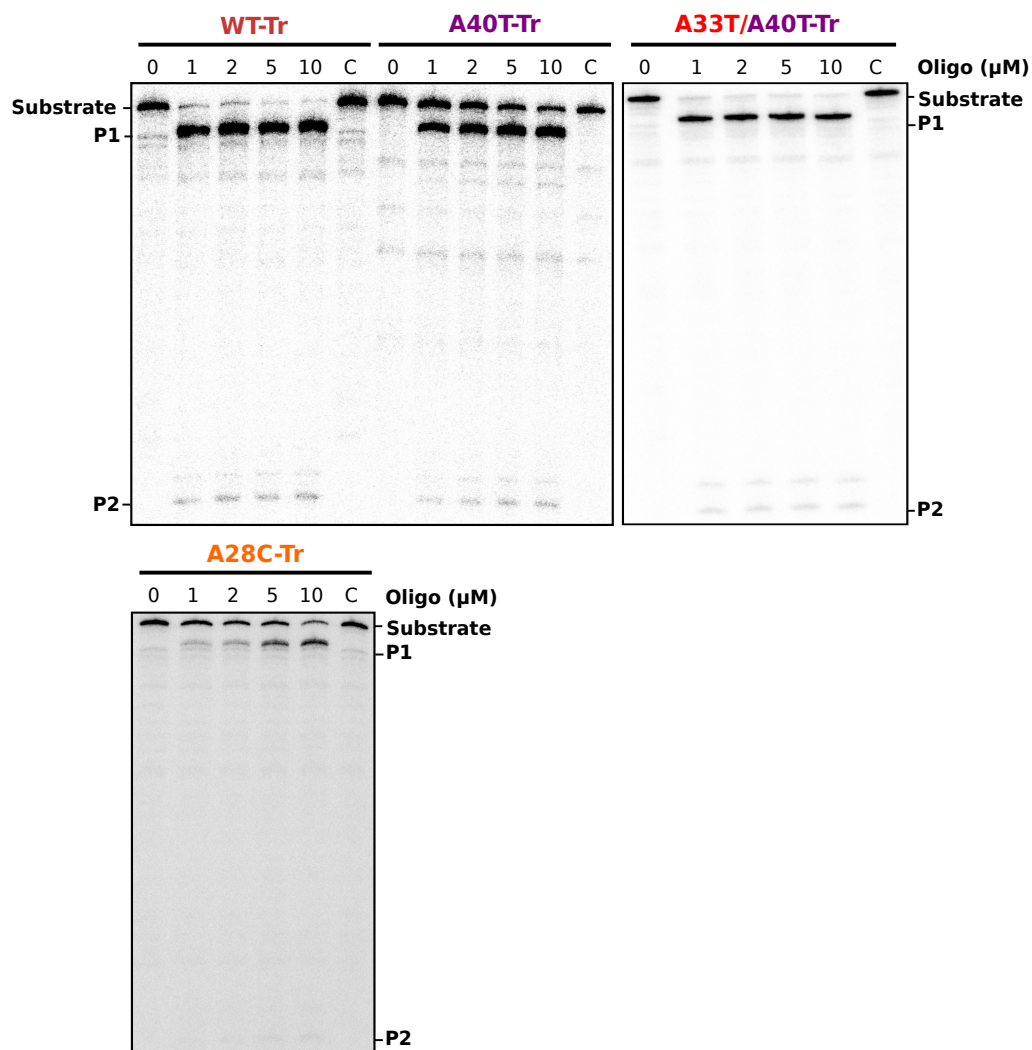

**Figure 5—figure supplement 1**

**Gel analysis of RNase H/ oligonucleotide accessibility assays.** 30 fmol of internally labeled RNA were used. DNA oligonucleotides were used to a final concentration of 0 to 10  $\mu\text{M}$ . Reactions were incubated for 30 min at 30°C in the presence or absence (C, control) of 0.25 U *E. coli* RNase H1. Reactions were stopped with 10  $\mu\text{l}$  of 2X Loading Buffer and products were analyzed in an 8% denaturing PAA gel. See Figure 5B for relative band quantification. P1 and P2 indicate the two RNase H-oligonucleotide-mediated RNA cleavage products.

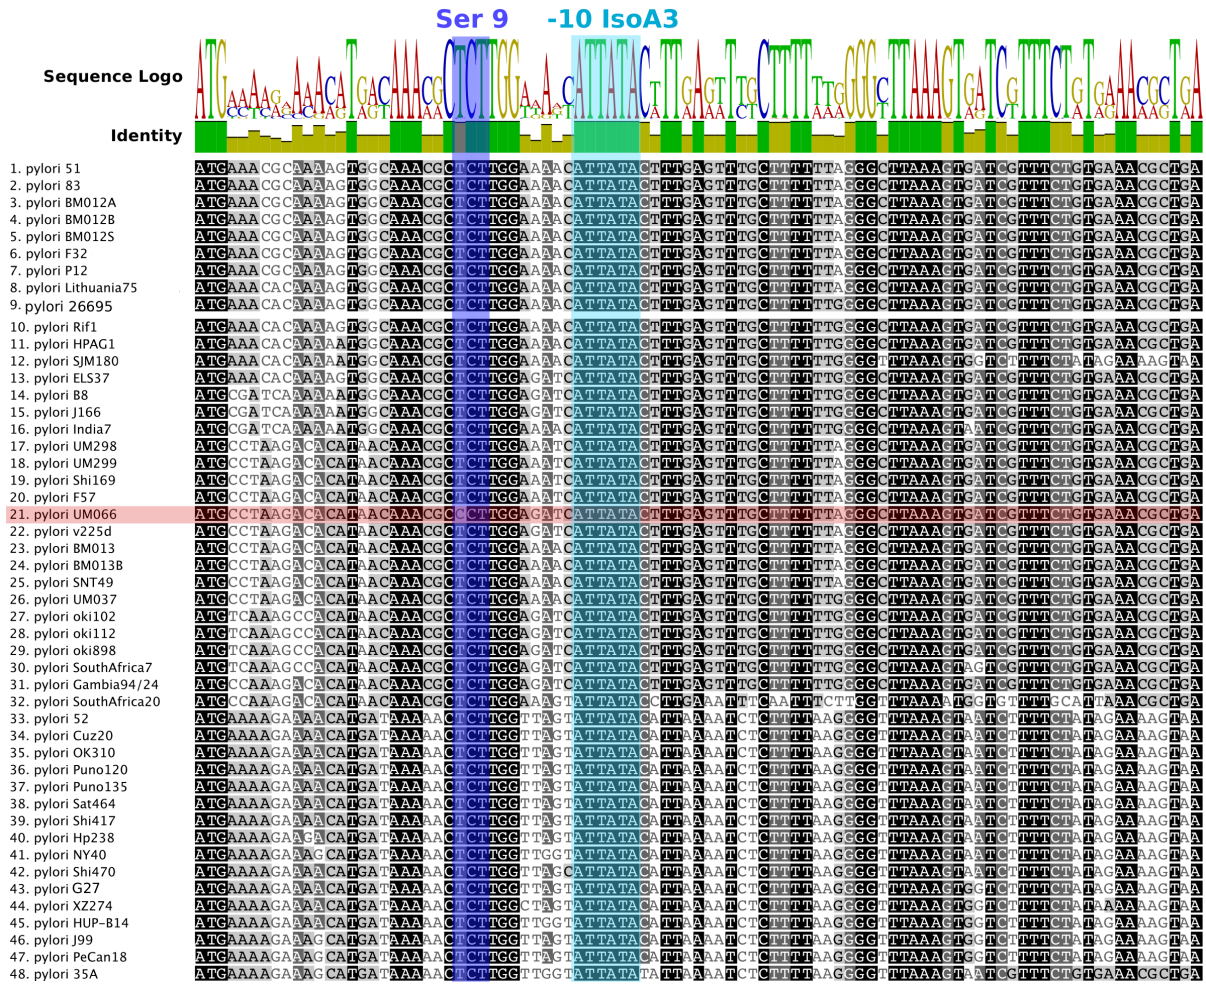

**Figure 6—figure supplement 1**

**Nucleotide alignment of AapA3 coding region of 49 *Helicobacter pylori* strains.** Conserved nucleotides are highlighted in different tones of grey depending on their conservation level. Sequence logo and identity scores are shown on the top. The highly conserved region corresponding to the second SD sequestering-sequence (serine residue at position 9) and the IsoA3 -10 box are highlighted in dark and light blue, respectively. The UMo66 strain, only strain containing a CCT Proline codon at position 9, is highlighted in pink. Geneious software 8.1.8 (Kearse et al., 2012) was used for sequence collection and alignment.

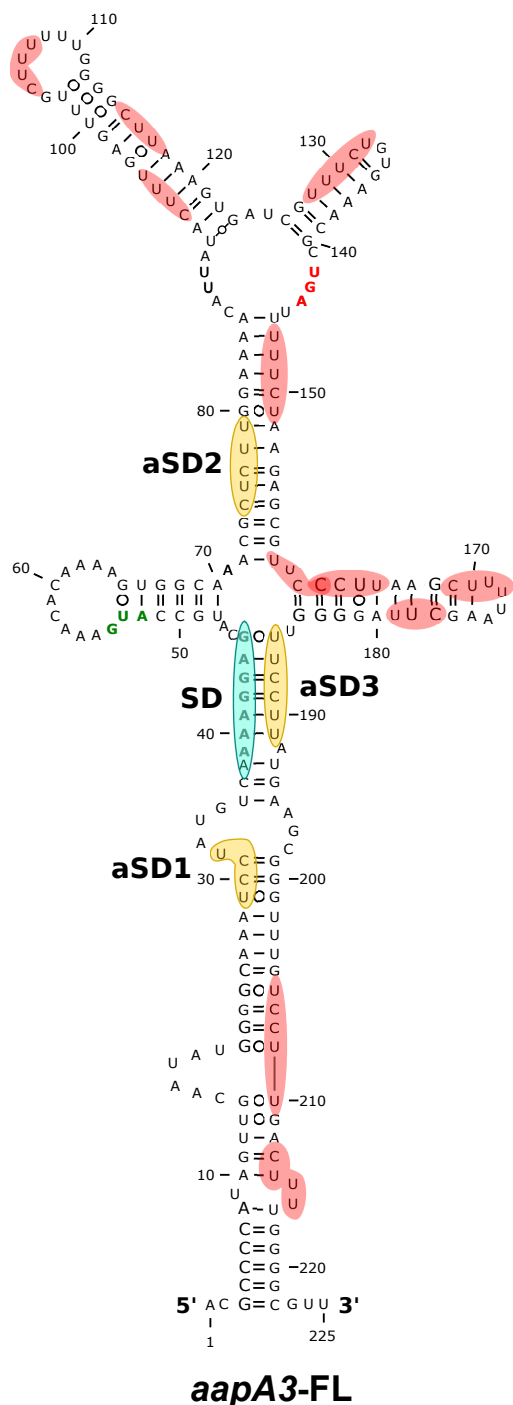

**Figure 7—figure supplement 1**

**Only three out of the thirteen potential aSD sequenced embedded in *aapA3* mRNA are functional.** 2D structure predictions were generated with the RNAfold Web Server (Gruber et al., 2008) and VARNA (Darty et al., 2009) was used to perform the drawing. Potential, but not used, anti-Shine-Dalgarno (aSD) sequences (UC-rich motifs) are highlighted in red. The three functional aSD sequences (aSD1, aSD2, aSD3) are shown in gold. Shine-Dalgarno (SD) sequence is shown in turquoise. Translation start and stop codons are shown in green and red, respectively.

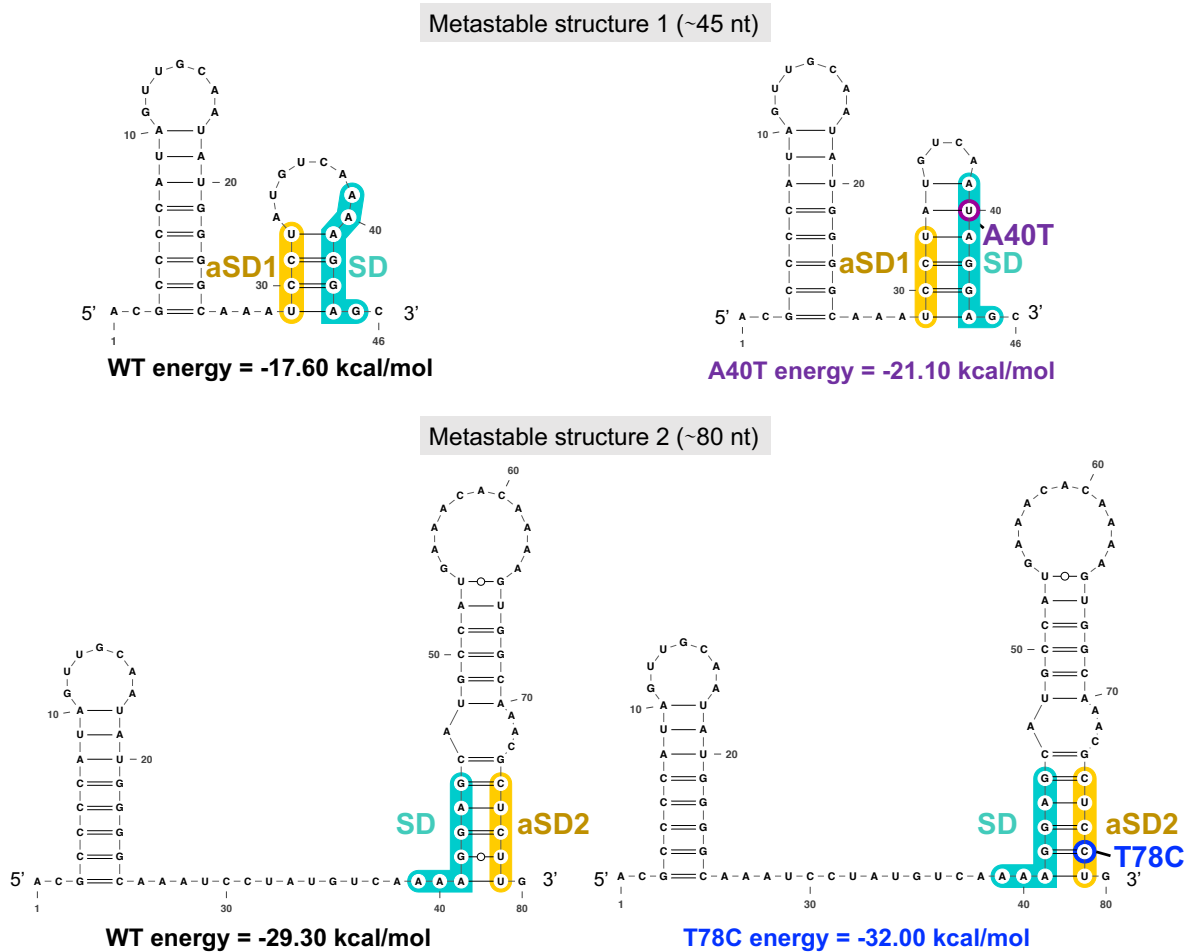

**Figure 7—figure supplement 2**

**The two successive AapA3 mRNA metastable structures have increasing stability and are stabilized by the A40T and the T78C suppressors.** The two metastable structures (1, ~46-nt long, upper panel; and 2, ~80-nt long, lower panel) successively formed during AapA3 mRNA transcription are shown. Shine-Dalgarno (SD) sequence is highlighted in turquoise, anti-SD (aSD) sequences (aSD1 and aSD2) are highlighted in yellow, suppressor mutation stabilizing SD sequestration by aSD1 in the metastable structure 1 is highlighted in purple (A40T), the suppressor stabilizing the SD sequestration by aSD2 in the metastable structure 2 is highlighted in blue (T78C). RNAfold (Gruber et al., 2008) was used for secondary structure and minimum free energy predictions, and VARNA (Darty et al., 2009) for drawing.

**Table 1. *Helicobacter pylori* strains used in this work**

| Name                                      | Strain number | Description                                                                                                             | Plasmid | Resistance       | Reference           |
|-------------------------------------------|---------------|-------------------------------------------------------------------------------------------------------------------------|---------|------------------|---------------------|
| 26695                                     | JR34 (H5)     | Wild type 26695 strain, Institut Pasteur collection                                                                     | none    | -                | (Tomb et al., 1997) |
| 26695 <i>rpsL</i> K43R                    | H158          | <i>rpsL</i> gene mutated on the Lys at position 43 to Arg (K43R)                                                        | none    | Str <sup>R</sup> | this study          |
| 26695 $\Delta$ <i>aapA3</i> /IsoA3        | H204          | $\Delta$ <i>aapA3</i> /IsoA3:: <i>rpsL</i> <sub>CF</sub> - <i>erm</i> / <i>rpsL</i> K43R                                | none    | Erm <sup>R</sup> | this study          |
| 26695 Complemented <i>aapA3</i> /IsoA3    | H170          | $\Delta$ <i>aapA3</i> /IsoA3 + <i>aapA3</i> /IsoA3 (C <sup>A3</sup> )                                                   | none    | Str <sup>R</sup> | this study          |
| 26695 <i>aapA3</i> start                  | H171          | <i>aapA3</i> start codon mutated to ATT by the single point mutation G54T                                               | none    | Str <sup>R</sup> | this study          |
| 26695 <i>aapA3</i> $\Delta$ T109          | H172          | <i>aapA3</i> carrying a -1 frameshift mutation (deletion of T at position 109) generating a 23 amino acids-long peptide | none    | Str <sup>R</sup> | this study          |
| 26695 <i>aapA3</i> start/plsoA3*          | H173          | <i>aapA3</i> G54T and IsoA3 promoter inactivated by the double point mutation A87C/A90G                                 | none    | Str <sup>R</sup> | this study          |
| 26695 <i>aapA3</i> G43A/plsoA3*           | H247          | <i>aapA3</i> SD inactivated by the G43A mutation and IsoA3 promoter A87C/A90G                                           | none    | Str <sup>R</sup> | this study          |
| 26695 <i>aapA3</i> T107C/plsoA3*          | H278          | <i>aapA3</i> ORF suppressor T107C (Phe 19 Ser) and IsoA3 promoter A87C/A90G                                             | none    | Str <sup>R</sup> | this study          |
| 26695 <i>aapA3</i> A28C/plsoA3*           | H224          | <i>aapA3</i> A28C suppressor mutation and IsoA3 promoter A87C/A90G                                                      | none    | Str <sup>R</sup> | this study          |
| 26695 <i>aapA3</i> A40T/plsoA3*           | H225          | <i>aapA3</i> A40T and IsoA3 promoter A87C/A90G                                                                          | none    | Str <sup>R</sup> | this study          |
| 26695 <i>aapA3</i> A33T/A40T/G54T/plsoA3* | H257          | <i>aapA3</i> A40T/A33T/G54T and IsoA3 promoter A87C/A90G                                                                | none    | Str <sup>R</sup> | this study          |
| 26695 <i>aapA3</i> T78C/plsoA3*           | H240          | <i>aapA3</i> T78C and IsoA3 promoter A87C/A90G                                                                          | none    | Str <sup>R</sup> | this study          |
| 26695 <i>aapA3</i> T78C                   | H226          | <i>aapA3</i> T78C with wild-type IsoA3 expression                                                                       | none    | Str <sup>R</sup> | this study          |

\* Nucleotide positions are indicated relative to the AapA3 transcriptional start site (TSS, +1).

**Table 2. Plasmids used in this work**

| Name                   | Description                                                                                                                                      | Origin/<br>Marker            | Reference                                                                  |
|------------------------|--------------------------------------------------------------------------------------------------------------------------------------------------|------------------------------|----------------------------------------------------------------------------|
| pSP60 -2               | pSP60 carrying the counter selection cassette <i>rpsL-erm</i>                                                                                    | pSC101*/<br>Amp <sup>R</sup> | (Dailidiene, D. <i>et al.</i> , 2006)<br>(Pernitzsch <i>et al.</i> , 2014) |
| pA3-Up WT              | pGEM-T carrying the upstream fragment of the <i>aapA3/IsoA3</i> locus amplified with the FA406/FA386 primer pair                                 | ColE1/<br>Amp <sup>R</sup>   | this study                                                                 |
| pA3-Down WT            | pGEM-T carrying the downstream fragment of the <i>aapA3/IsoA3</i> locus amplified with the FA409/FA387 primer pair                               | ColE1/<br>Amp <sup>R</sup>   | this study                                                                 |
| pA3-Down pIsoA3*       | pGEM-T carrying the downstream fragment of the <i>aapA3/IsoA3</i> locus containing IsoA3 -10 box inactivated (A87C/A90G)                         | ColE1/<br>Amp <sup>R</sup>   | this study                                                                 |
| pA3-Up <i>start</i>    | pGEM-T carrying the upstream fragment of the <i>aapA3/IsoA3</i> locus containing the AapA3 start codon mutation G54T                             | ColE1/<br>Amp <sup>R</sup>   | this study                                                                 |
| pA3-Up A28C            | pGEM-T carrying the upstream fragment of the <i>aapA3/IsoA3</i> locus containing the suppressor A28C                                             | ColE1/<br>Amp <sup>R</sup>   | this study                                                                 |
| pA3-Up A33T            | pGEM-T carrying the upstream fragment of the <i>aapA3/IsoA3</i> locus containing the A33T mutation                                               | ColE1/<br>Amp <sup>R</sup>   | this study                                                                 |
| pA3-Up A40T            | pGEM-T carrying the upstream fragment of the <i>aapA3/IsoA3</i> locus containing the suppressor A40T                                             | ColE1/<br>Amp <sup>R</sup>   | this study                                                                 |
| pA3-Up A40T/A33T       | pGEM-T carrying the upstream fragment of the <i>aapA3/IsoA3</i> locus containing the A40T and the compensatory mutation A33T                     | ColE1/<br>Amp <sup>R</sup>   | this study                                                                 |
| pA3-Up T78C            | pGEM-T carrying the upstream fragment of the <i>aapA3/IsoA3</i> locus containing the suppressor T78C                                             | ColE1/<br>Amp <sup>R</sup>   | this study                                                                 |
| pA3-Down T78C          | pGEM-T carrying the downstream fragment of the <i>aapA3/IsoA3</i> locus containing the suppressor T78C                                           | ColE1/<br>Amp <sup>R</sup>   | this study                                                                 |
| pA3-Down T78C/ pIsoA3* | pGEM-T carrying the downstream fragment of the <i>aapA3/IsoA3</i> locus containing the suppressor T78C and IsoA3 -10 box inactivated (A87C/A90G) | ColE1/<br>Amp <sup>R</sup>   | this study                                                                 |
| pA3-Up G43A            | pGEM-T carrying the upstream fragment of the <i>aapA3/IsoA3</i> locus containing the SD suppressor G43A                                          | ColE1/<br>Amp <sup>R</sup>   | this study                                                                 |

\* Nucleotide positions are indicated relative to the AapA3 transcriptional start site (TSS, +1).

**Table 3. *Escherichia coli* strains used in this work**

| Name                  | Description/ genotype                                                                                                                                                                                                               | Plasmid              | Resistance       | Reference   |
|-----------------------|-------------------------------------------------------------------------------------------------------------------------------------------------------------------------------------------------------------------------------------|----------------------|------------------|-------------|
| TOP10                 | <i>mcrA</i> $\Delta$ ( <i>mrr-hsdRMS-mcrBC</i> ) $\Phi$ 80 <i>lacZ</i> $\Delta$ M15<br><i><math>\Delta</math>lacX74 deoR recA1</i><br><i>araD139 <math>\Delta</math>(ara-leu)7697</i><br><i>galU galK rpsL endA1</i><br><i>nupG</i> | none                 | none             | Invitrogene |
| A3-Up WT              | TOP10                                                                                                                                                                                                                               | pA3-Up WT            | Amp <sup>R</sup> | this study  |
| A3-Down WT            | TOP10                                                                                                                                                                                                                               | pA3-Do WT            | Amp <sup>R</sup> | this study  |
| A3-Down pIsoA3*       | TOP10                                                                                                                                                                                                                               | pA3-Do pIsoA3*       | Amp <sup>R</sup> | this study  |
| A3-Up <i>start</i>    | TOP10                                                                                                                                                                                                                               | pA3-Up <i>start</i>  | Amp <sup>R</sup> | this study  |
| A3-Up A28C            | TOP10                                                                                                                                                                                                                               | pA3-Up A28C          | Amp <sup>R</sup> | this study  |
| A3-Up A33T            | TOP10                                                                                                                                                                                                                               | pA3-Up A33T          | Amp <sup>R</sup> | this study  |
| A3-Up A40T            | TOP10                                                                                                                                                                                                                               | pA3-Up A40T          | Amp <sup>R</sup> | this study  |
| A3-Up A40T/A33T       | TOP10                                                                                                                                                                                                                               | pA3-Up A40T/A33T     | Amp <sup>R</sup> | this study  |
| A3-Up T78C            | TOP10                                                                                                                                                                                                                               | pA3-Up T78C          | Amp <sup>R</sup> | this study  |
| A3-Down T78C          | TOP10                                                                                                                                                                                                                               | pA3-Do T78C          | Amp <sup>R</sup> | this study  |
| A3-Down T78C/ pIsoA3* | TOP10                                                                                                                                                                                                                               | pA3-Do T78C/ pIsoA3* | Amp <sup>R</sup> | this study  |
| A3-Up G43A            | TOP10                                                                                                                                                                                                                               | pA3-Up G43A          | Amp <sup>R</sup> | this study  |

\* Nucleotide positions are indicated relative to the AapA3 transcriptional start site (TSS, +1).

**Table 4. Oligonucleotides used in this work**

| Name  | Sequence (5'→3' direction)                             | Used for                                                                                                                                        |
|-------|--------------------------------------------------------|-------------------------------------------------------------------------------------------------------------------------------------------------|
| FD11  | GAAATTAATACGACTCACTATAGCAAGAGCGTTT<br>GCCACTT          | Reverse primers carrying a T7 promoter for IsoA3 amplification for <i>in vitro</i> transcription                                                |
| FD17  | ACGCCCCATAGTTGCAATAT                                   | Forward primer for IsoA3 amplification for <i>in vitro</i> transcription                                                                        |
| FD35  | TCGGAATGGTTAACTGGGTAGTTCCT                             | Reverse primer for 5S rRNA mRNA detection by Northern Blot                                                                                      |
| FD38  | GCTCCTTTTGACATAGGATT                                   | Reverse primer for <i>aapA3</i> mRNA detection by Northern Blot                                                                                 |
| FA110 | TGCTTTATAACTATGGATTAAAC                                | Forward primer for <i>rpsL-erm</i> cassette amplification from pSP60                                                                            |
| FA111 | TTACTTATTAATAATTTATAGC                                 | Reverse primer for <i>rpsL-erm</i> cassette amplification from pSP60                                                                            |
| FA170 | GAAATTAATACGACTCACTATAGGACGCCCCATA<br>GTTGCAATAT       | Forward primer carrying a T7 promoter for <i>aapA3</i> <i>in vitro</i> transcription                                                            |
| FA173 | AGGAAACCCCTAAGCTTAAAAGC                                | Reverse primer for <i>aapA3</i> -Tr amplification                                                                                               |
| FA175 | GACCAACGCCCCAAAAGTC                                    | Reverse primer for <i>aapA3</i> full-length amplification                                                                                       |
| FA281 | AGCATGCCATTAAACACAAA                                   | Forward primer for mutagenesis of <i>aapA3</i> 26695 start codon (G54A)                                                                         |
| FA282 | TTTGTGTTTAATGGCATGCT                                   | Reverse primer for mutagenesis of <i>aapA3</i> 26695 start codon (G54A)                                                                         |
| FA283 | TGGAAAACCTTGACTTTGAGT                                  | Forward primer for mutagenesis of IsoA3 -10 box: mutations A87C/A90G                                                                            |
| FA284 | ACTCAAAGTACAAGTTTTCCA                                  | Reverse primer for mutagenesis of IsoA3 -10 box: mutations A87C/A90G                                                                            |
| FA386 | CCAAGAGCGTTTGCCACTTTTG                                 | Reverse primer for <i>aapA3</i> /IsoA3 locus split cloning in pGEM®T (upstream fragment)                                                        |
| FA387 | CACAAAAGTGGCAAACGCTC                                   | Forward primer for <i>aapA3</i> /IsoA3 locus split cloning in pGEM®T (downstream fragment)                                                      |
| FA395 | CTTTCCTACACGACGCTCTTCCGATCTCTATCC<br>AATAAAGATAAGC     | Forward primer for <i>aapA3</i> 26695 amplification for Illumina paired-end sequencing                                                          |
| FA396 | GGAGTTCAGACGTGTGCTCTTCCGATCTGCACT<br>CTATGAGGGGATTTAG  | Reverse primer for <i>aapA3</i> 26695 amplification for Illumina paired-end sequencing                                                          |
| FA406 | GCATTATAAAATGAAATCC                                    | Forward primer for the amplification of <i>aapA3</i> 26695 fragment Up from <i>hpn</i> -like                                                    |
| FA407 | <b>GTTAATCCATAGTTATAAAGCACAAAAGAGG</b><br>GATTTTAAAAG  | Reverse primer for the amplification of <i>aapA3</i> 26695 Up fragment to generate the <i>aapA3</i> /IsoA3 locus deletion designed for deep-seq |
| FA408 | <b>GCTATAAATTATTTAATAAGTAACCGCTTGCTCT</b><br>AGCTTTTGG | Forward for the amplification of <i>aapA3</i> 26695 Down fragment to generate the                                                               |



|       |                                                                           |                                                                                                                                            |
|-------|---------------------------------------------------------------------------|--------------------------------------------------------------------------------------------------------------------------------------------|
|       |                                                                           | <i>aapA3</i> /IsoA3 locus deletion designed for deep-seq                                                                                   |
| FA409 | CTAGCCACGCTCTATTAGAG                                                      | Reverse for the amplification of <i>aapA3</i> 26695 Down fragment to generate the <i>aapA3</i> /IsoA3 locus deletion designed for deep-seq |
| FA465 | CAATATGGGGCAA <b>c</b> TCCTATGTC                                          | Forward primer for the introduction of the suppressor A28C                                                                                 |
| FA466 | GACATAGGA <b>g</b> TTGCCCCATATTG                                          | Reverse primer for the introduction of the suppressor A28C                                                                                 |
| FA467 | CCTATGTCAA <b>a</b> AGGAGCATG                                             | Forward primer for the introduction of the suppressor A40T                                                                                 |
| FA468 | CATGCTCCT <b>a</b> TTGACATAGG                                             | Reverse primer for the introduction of the suppressor A40T                                                                                 |
| FA511 | CAAAGTGGCAAACGCTC <b>c</b> TGGAAAAC <b>c</b> TTgTAC<br>TTTGAGTTT <b>G</b> | Forward primer for the introduction of the suppressor T78C                                                                                 |
| FA512 | GTTTTCCAgGAGCGTTT <b>G</b> CCACTTTT <b>G</b>                              | Reverse primer for the introduction of the suppressor T78C                                                                                 |
| FA535 | CCTATGTCAA <b>AA</b> GaAGCATGCCATGAAACAC                                  | Forward primer for the introduction of the SD mutation G43A                                                                                |
| FA536 | GTGTTTCATGGCATGCT <b>t</b> CTTTT <b>G</b> ACATAGG                         | Reverse primer for the introduction of the SD mutation G43A                                                                                |
| FA546 | GTTGCAATATGGGGCAAATCCT <b>t</b> TGTCAA <b>AA</b> AGGA<br>GCATGCC          | Forward primer for the introduction of A33T mutation (complementation of A40T suppressor)                                                  |
| FA547 | GGCATGCTCCTTTT <b>G</b> ACA <b>a</b> AGGATTTGCCCCATA<br>TTGCAAC           | Reverse primer for the introduction of A33T mutation (complementation of A40T suppressor)                                                  |
| FA548 | GTTGCAATATGGGGCAAATCCT <b>t</b> TGTCAA <b>AA</b> AGGA<br>GCATGCC          | Forward primer for the introduction of A33T mutation in <i>aapA3</i> A40T mutant background                                                |
| FA549 | GGCATGCTCCT <b>a</b> TTGACA <b>a</b> AGGATTTGCCCCATA<br>TTGCAAC           | Reverse primer for the introduction of A33T mutation in <i>aapA3</i> A40T mutant background                                                |
| FA633 | CATGGCATGCTCCTTT                                                          | RNaseH/oligonucleotide accessibility assay on WT-FL, WT-Tr and T78C-Tr <i>aapA3</i> mRNAs                                                  |
| FA644 | CATAGGATTTGCC <b>CCA</b>                                                  | RNaseH/oligonucleotide accessibility assay on A40T-Tr <i>aapA3</i> mRNA                                                                    |
| FA651 | CAAAGGATTTGCC <b>CCA</b>                                                  | RNaseH/oligonucleotide accessibility assay on A33T/A40T-Tr <i>aapA3</i> mRNA                                                               |
| FA652 | CATAGGAGTTGCC <b>CCA</b>                                                  | RNaseH/oligonucleotide accessibility assay on A28C-Tr <i>aapA3</i> mRNA                                                                    |

\* Nucleotide positions are indicated relative to the *AapA3* transcriptional start site (TSS, +1).

\*\* Sequences highlighted in bold correspond to *rpsL-erm* 5'-overhang tails used for assembly PCR during the construction of the *aapA3*/IsoA3 deleted strain.

\*\*\* Underlined sequences correspond to the DNA adaptors used for Illumina paired-end sequencing approach.

\*\*\*\* Nucleotides in lowercase correspond to mutations introduced by site-directed mutagenesis PCR.

## KEY RESOURCES TABLE

| REAGENT or RESOURCE                                                          | SOURCE                                            | IDENTIFIER                                                                                                                  |
|------------------------------------------------------------------------------|---------------------------------------------------|-----------------------------------------------------------------------------------------------------------------------------|
| <b>Chemicals and Recombinant Proteins</b>                                    |                                                   |                                                                                                                             |
| DreamTaq DNA Polymerase                                                      | ThermoFischer Scientific                          | Cat#EP1701                                                                                                                  |
| Phusion High-Fidelity DNA Polymerase                                         | ThermoFischer Scientific                          | Cat#F530S                                                                                                                   |
| PfuUltra High-Fidelity DNA Polymerase                                        | Agilent                                           | Cat#600380                                                                                                                  |
| Alkaline Phosphatase, Calf Intestinal (CIP)                                  | New England Biolabs                               | Cat#M0290S                                                                                                                  |
| T4 Polynucleotide Kinase                                                     | New England Biolabs                               | Cat#M0201S                                                                                                                  |
| RNase T1                                                                     | New England Biolabs                               | Cat#AM2283                                                                                                                  |
| <i>E. coli</i> RNase H1                                                      | New England Biolabs                               | Cat#AM2293                                                                                                                  |
| RNasin Ribonuclease Inhibitors                                               | Promega                                           | Cat#N2511                                                                                                                   |
| <b>Recombinant DNA</b>                                                       |                                                   |                                                                                                                             |
| See Table 2 for the full list of plasmids used in this study                 | This paper                                        | N/A                                                                                                                         |
| <b>Bacterial Strains I: <i>Escherichia coli</i></b>                          |                                                   |                                                                                                                             |
| See Table 3 for the full list of <i>E. coli</i> strains used in this study   | This paper                                        | N/A                                                                                                                         |
| <b>Bacterial Strains II: <i>Helicobacter pylori</i></b>                      |                                                   |                                                                                                                             |
| See Table 1 for the full list of <i>H. pylori</i> strains used in this study | This paper                                        | N/A                                                                                                                         |
| <b>Critical Commercial Assays</b>                                            |                                                   |                                                                                                                             |
| pGEM-T Easy Vector System                                                    | Promega                                           | Cat#A1360                                                                                                                   |
| MEGAScript T7 Kit                                                            | ThermoFischer Scientific                          | Cat#AM1334                                                                                                                  |
| MAXIScript T7 Transcription Kit                                              | ThermoFischer Scientific                          | Cat#AM1213                                                                                                                  |
| High Purity Plasmid Miniprep Kit                                             | Neo Biotech                                       | Cat#NB-03-0002                                                                                                              |
| Quick Bacteria Genomic DNA extraction Kit                                    | Neo Biotech                                       | Cat#NB-03-0020                                                                                                              |
| <i>E. coli</i> 30S Extract System for Linear Templates Kit                   | Promega                                           | Cat#L1030                                                                                                                   |
| <b>Deposited Data</b>                                                        |                                                   |                                                                                                                             |
| Project and study description                                                | This paper                                        | NCBI BioProject PRJNA497299                                                                                                 |
| Deep-sequencing datasets raw data                                            | This paper                                        | NCBI SRA SRP166021                                                                                                          |
| Single-nucleotide substitutions, number of counts                            | This paper                                        | NCBI GEO GSE121423                                                                                                          |
| Single-nucleotide substitutions, statistical analysis by sequence            | This paper                                        | NCBI GEO GSE121423                                                                                                          |
| Single-nucleotide substitutions, statistical analysis by position            | This paper                                        | NCBI GEO GSE121423                                                                                                          |
| Single-nucleotide deletions, statistical analysis by position                | This paper                                        | NCBI GEO GSE121423                                                                                                          |
| Single-nucleotide insertions, statistical analysis by position               | This paper                                        | NCBI GEO GSE121423                                                                                                          |
| <b>Experimental Models: Organisms/Strains</b>                                |                                                   |                                                                                                                             |
| <i>E. coli</i> : One Shot TOP10 chemically competent cells                   | ThermoFischer Scientific                          | Cat#C404010                                                                                                                 |
| <b>Software and Algorithms</b>                                               |                                                   |                                                                                                                             |
| Cutadapt 1.1                                                                 | DOI:10.14806/ej.17.1.200                          | <a href="https://cutadapt.readthedocs.org/">https://cutadapt.readthedocs.org/</a>                                           |
| cmpfastq                                                                     | NIHR Biomedical Research Centre for Mental Health | <a href="http://compbio.brc.iop.kcl.ac.uk/software/cmpfastq.php">http://compbio.brc.iop.kcl.ac.uk/software/cmpfastq.php</a> |
| Prinseq-lite 0.20.4                                                          | (Schmieder and Edwards 2011)                      | <a href="http://prinseq.sourceforge.net/">http://prinseq.sourceforge.net/</a>                                               |
| PANDAseq 2.9                                                                 | (Masella <i>et al.</i> 2012)                      | <a href="https://github.com/neufeld/pandaseq">https://github.com/neufeld/pandaseq</a>                                       |

|                                                                       |                              |                                                                                                                                                     |
|-----------------------------------------------------------------------|------------------------------|-----------------------------------------------------------------------------------------------------------------------------------------------------|
| BWA-SW algorithm of BWA 0.7.12                                        | (Li and Durbin 2009)         | <a href="https://sourceforge.net/projects/bio-bwa/">https://sourceforge.net/projects/bio-bwa/</a>                                                   |
| Samtools 1.2                                                          | (Li <i>et al.</i> 2009)      | <a href="https://sourceforge.net/projects/samtools/">https://sourceforge.net/projects/samtools/</a>                                                 |
| Bamtools 2.3.0                                                        | (Barnett <i>et al.</i> 2011) | <a href="https://github.com/pezmaster31/bamtools">https://github.com/pezmaster31/bamtools</a>                                                       |
| R 3.2.0                                                               | (R Core Team 2015)           | <a href="http://www.R-project.org/">http://www.R-project.org/</a>                                                                                   |
| Differential analyses and Hierarchical tree clustering: Trinity 2.2.0 | (Haas <i>et al.</i> 2013)    | <a href="http://trinityrnaseq.github.io">http://trinityrnaseq.github.io</a>                                                                         |
| Differential analyses: DEseq2 1.10.1                                  | (Love <i>et al.</i> 2014)    | <a href="http://www.bioconductor.org/packages/release/bioc/html/DESeq2.html">http://www.bioconductor.org/packages/release/bioc/html/DESeq2.html</a> |
| <b>Oligonucleotides</b>                                               |                              |                                                                                                                                                     |
| See Table 4 for the full list of oligonucleotides used in this study  | This paper                   | N/A                                                                                                                                                 |
